# Supplementary material for: TORC1 regulates the transcriptional response to glucose and developmental cycle via the Tap42-Sit4-Rrd1/2 pathway in Saccharomyces cerevisiae
Source: PubMed Central journal article supplement (PMC8103650; doi:10.1186/s12915-021-01030-3), 2021-05-06
Supplement: 12915_2021_1030_MOESM1_ESM.pdf [file 12915_2021_1030_MOESM1_ESM.pdf]

**a**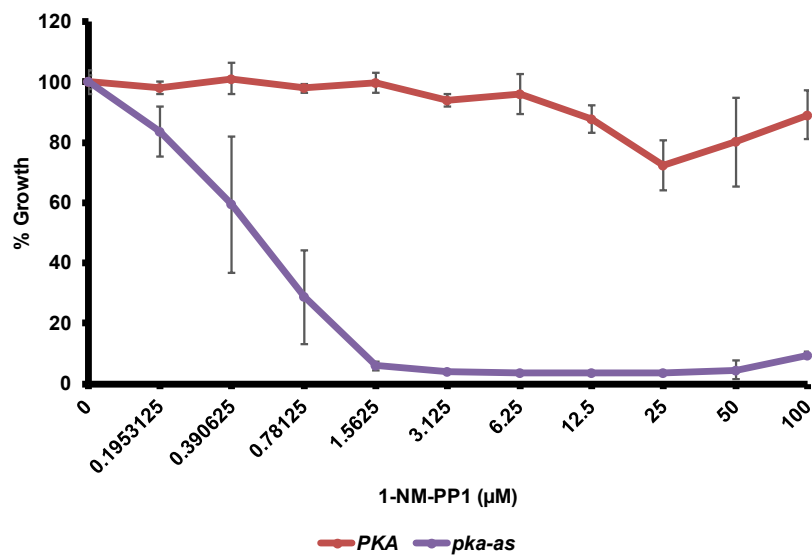**b**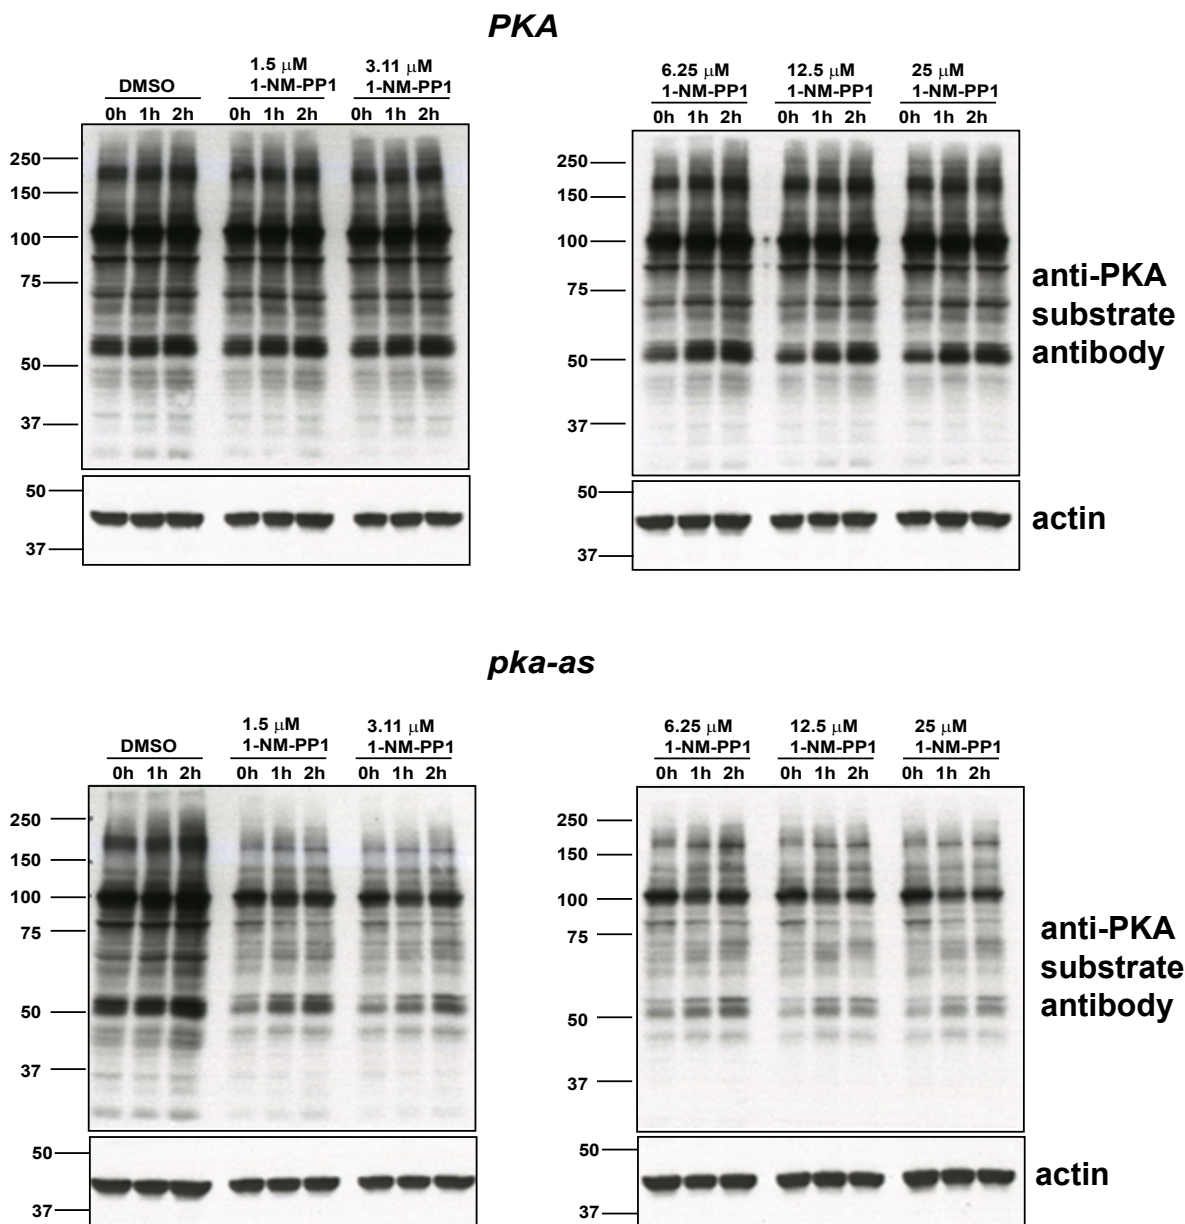**Figure S1**

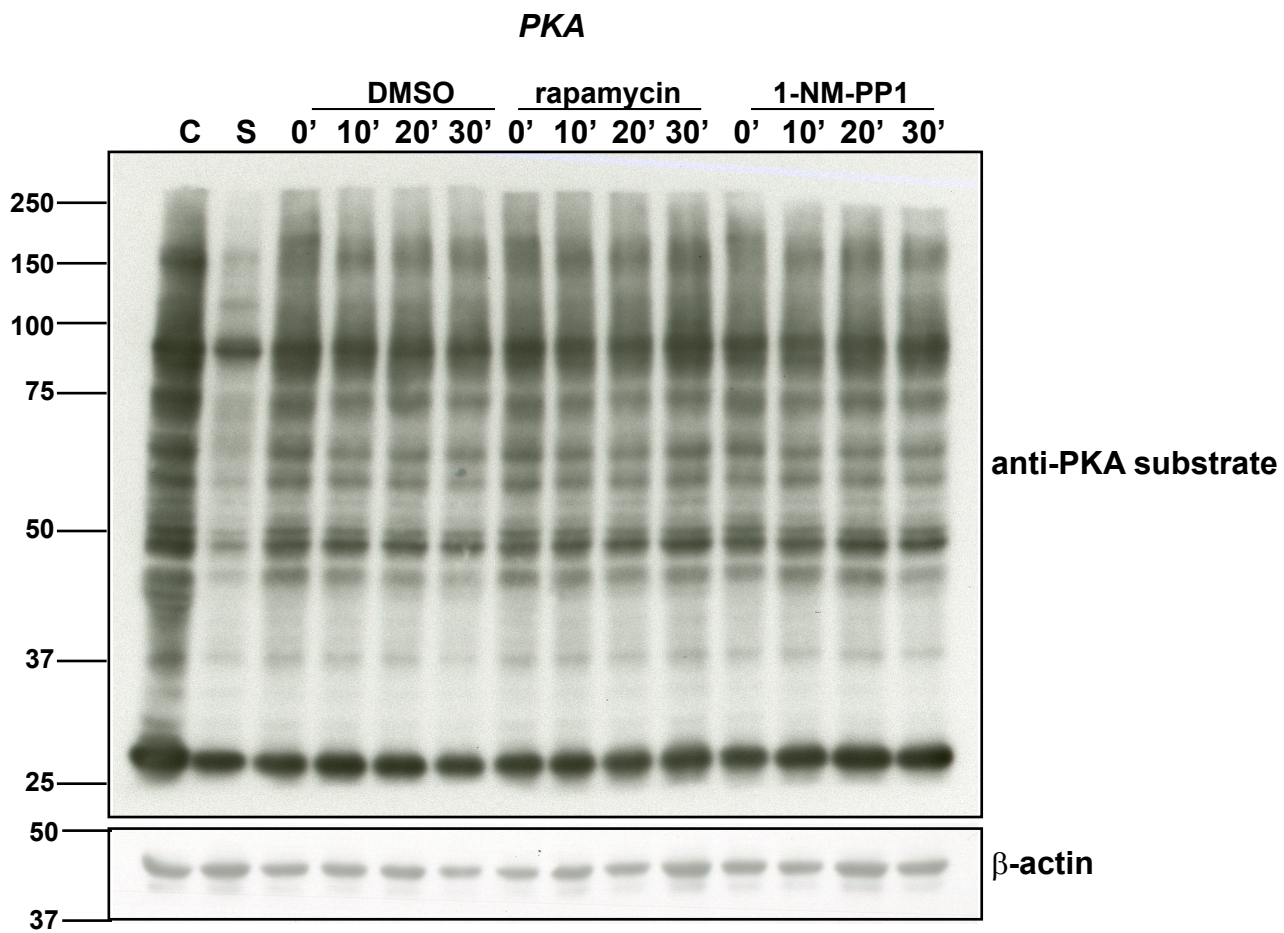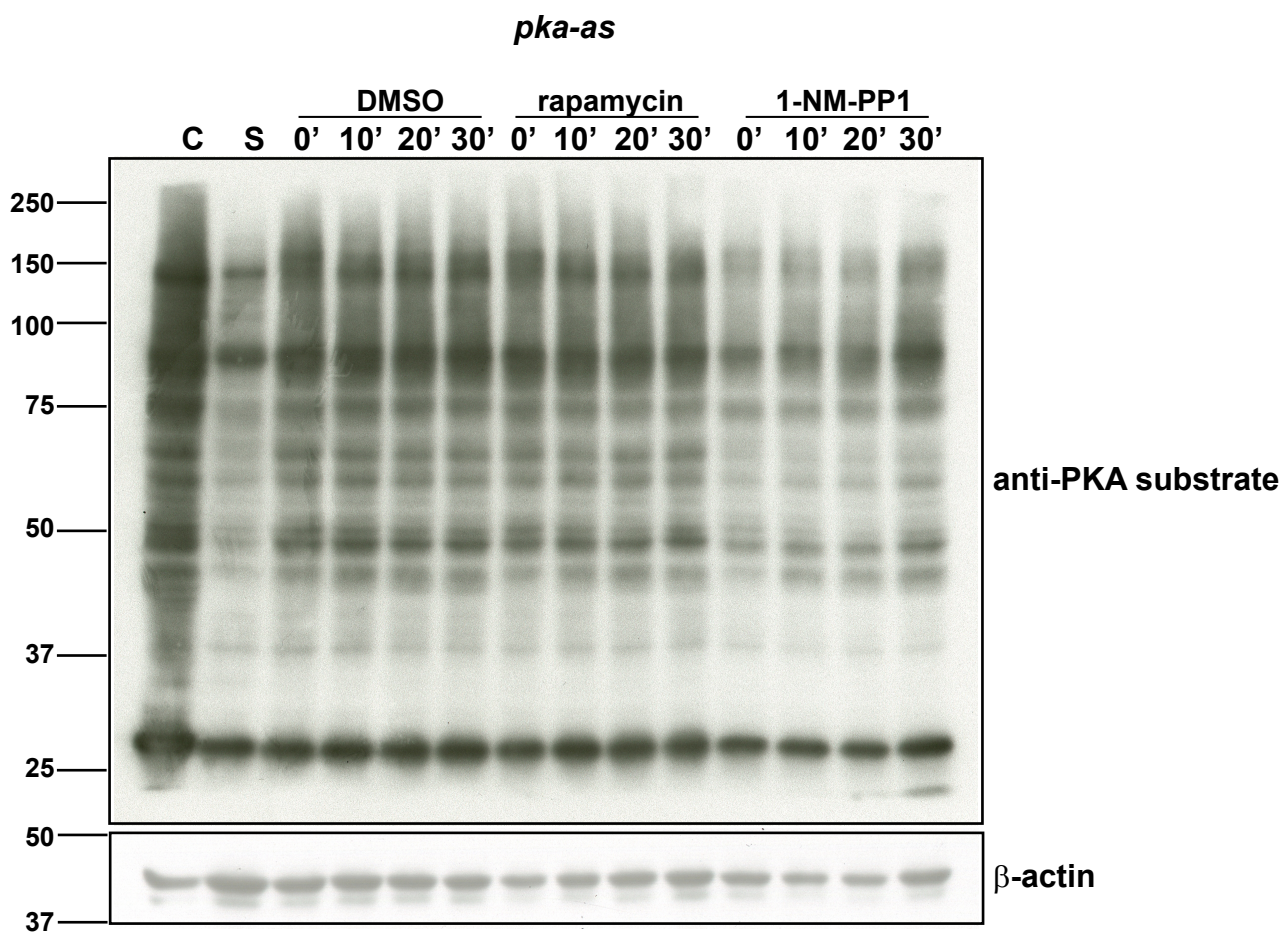

**Figure S2**

*DHR2*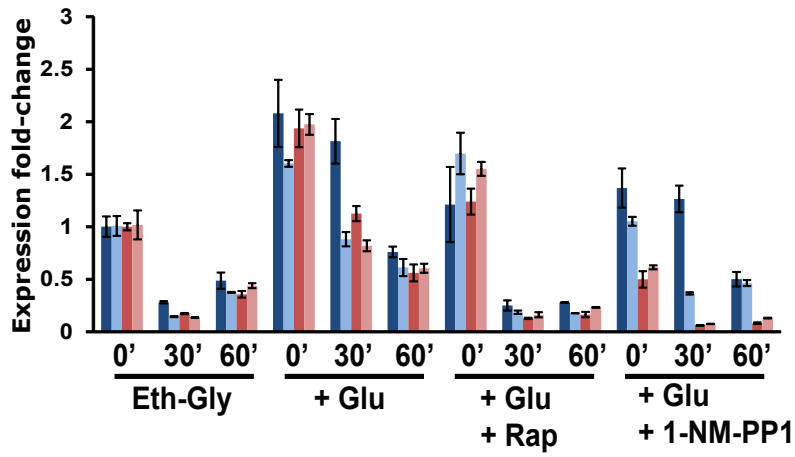*RME1*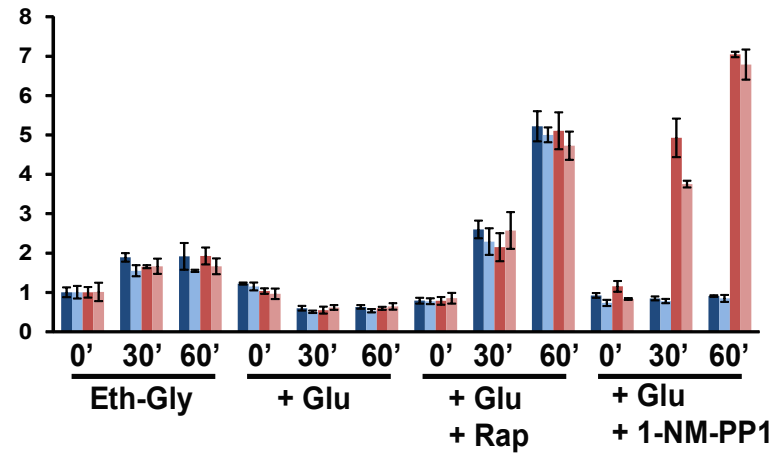*GPG1*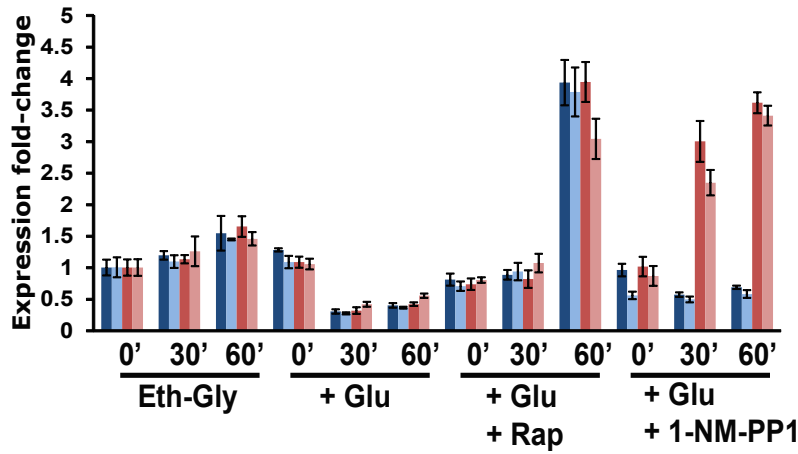*UGA1*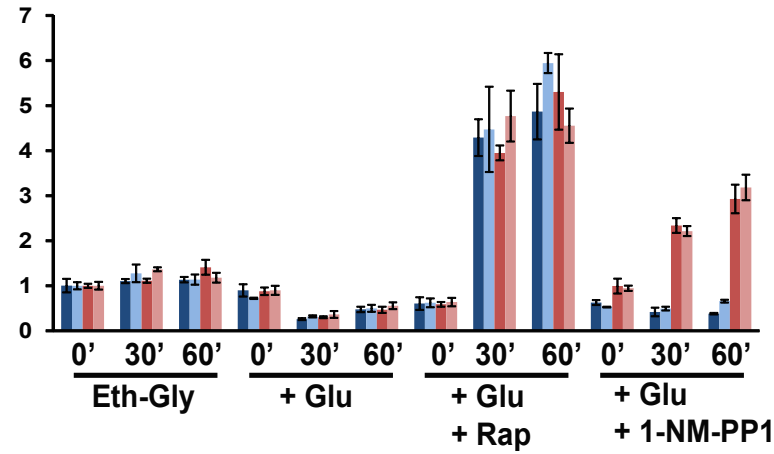*CRC1*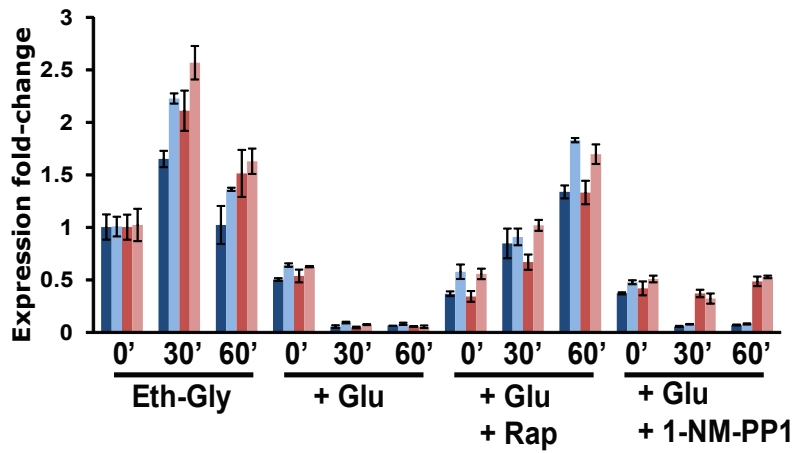*GFD2*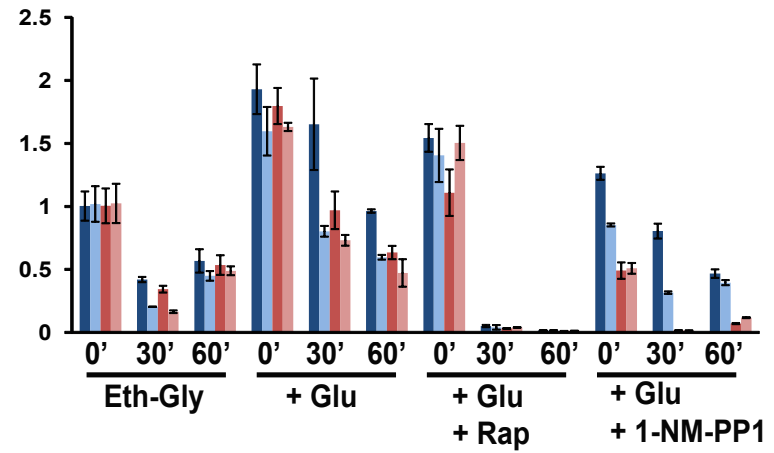*CIT1*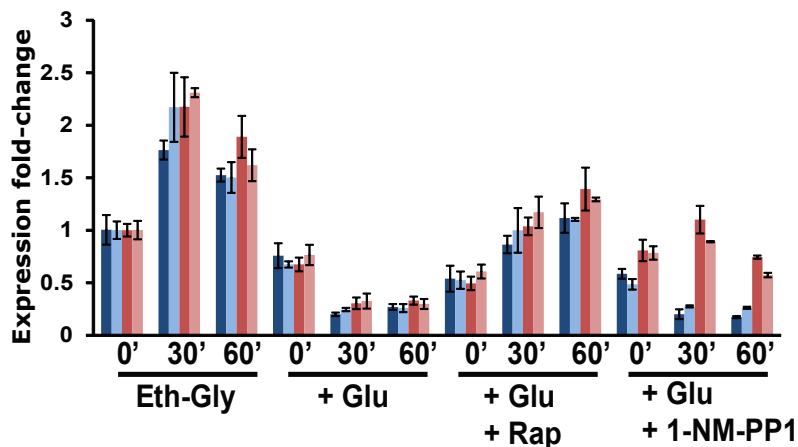

■ *PKA* Replicate 2  
 ■ *PKA* Replicate 3  
 ■ *pka-as* Replicate 2  
 ■ *pka-as* Replicate 3

**Figure S3**
