# Supplementary material for: TORC1 regulates the transcriptional response to glucose and developmental cycle via the Tap42-Sit4-Rrd1/2 pathway in Saccharomyces cerevisiae
Source: PubMed Central journal article supplement (PMC8103650; doi:10.1186/s12915-021-01030-3), 2021-05-06
Supplement: 12915_2021_1030_MOESM3_ESM.pdf [file 12915_2021_1030_MOESM3_ESM.pdf]

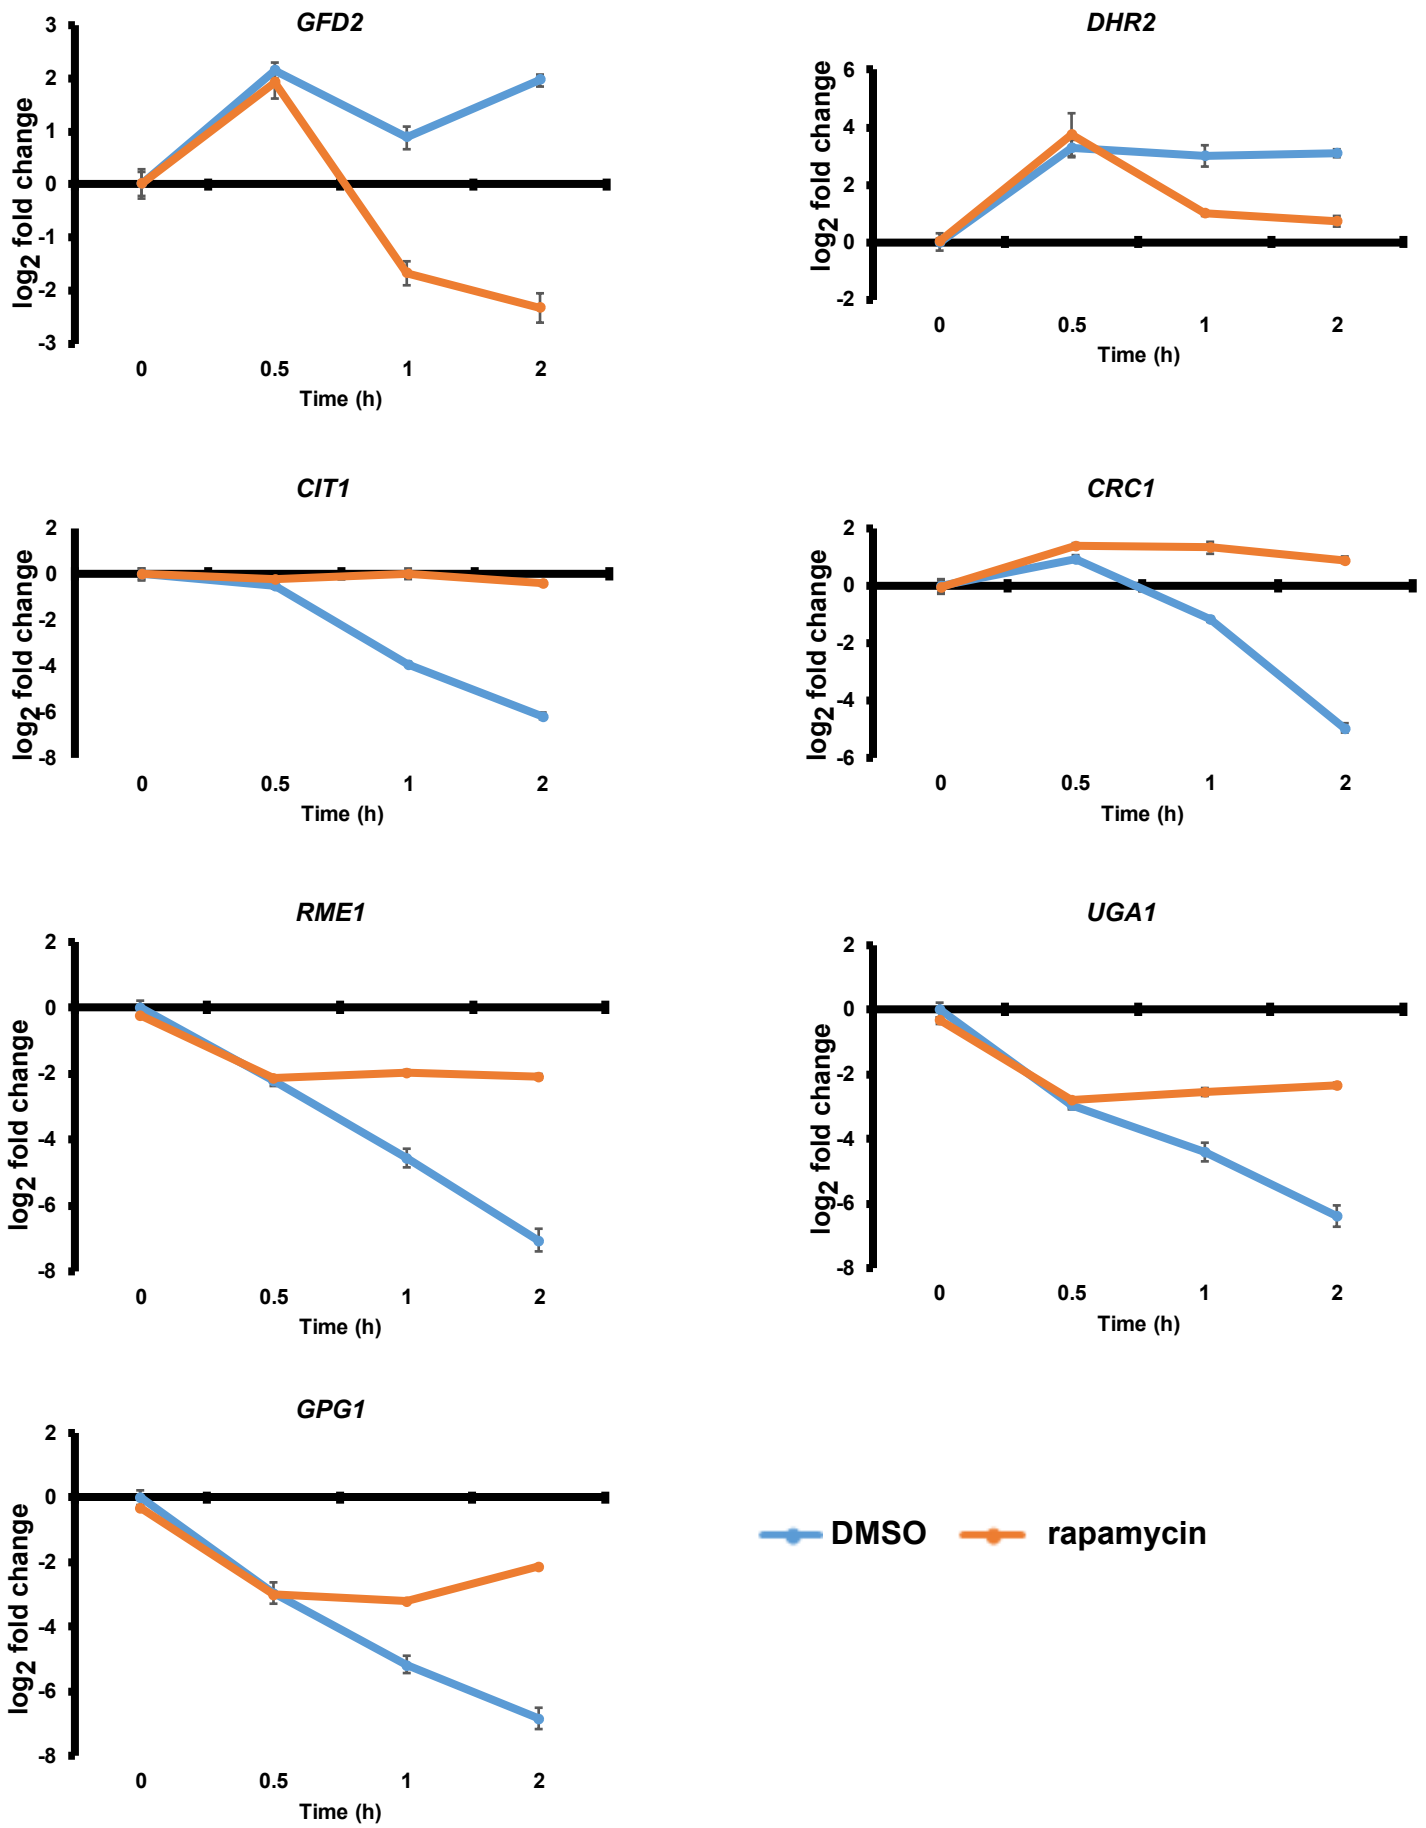

**Figure S4**

**BCY1**

***bcy1-T129D***

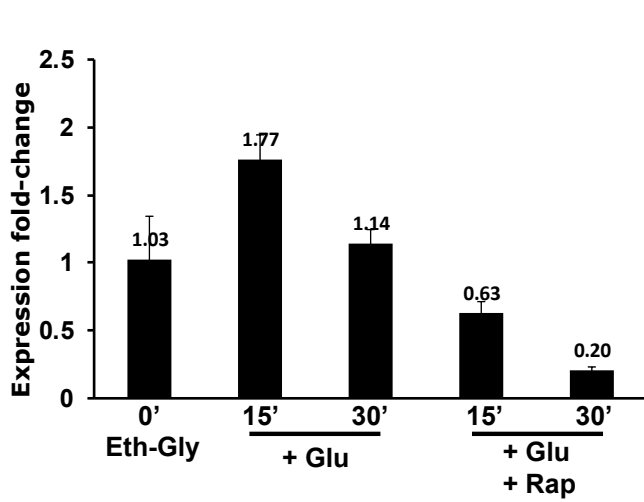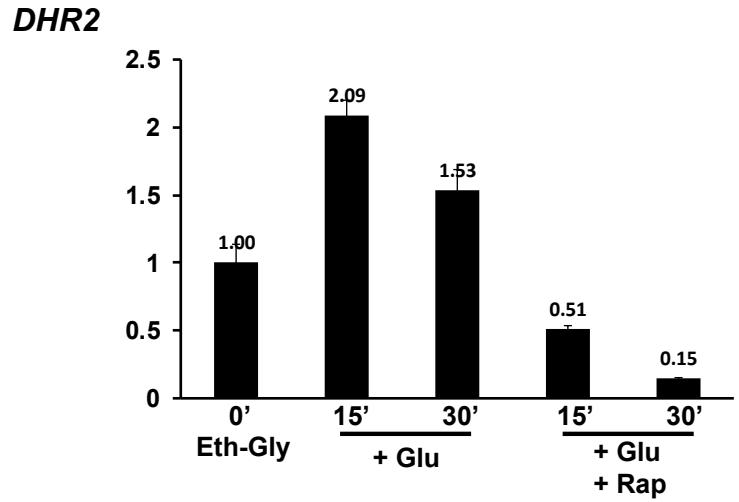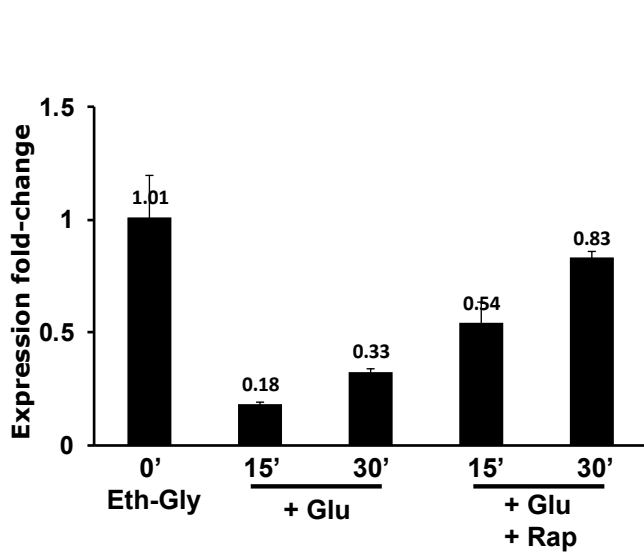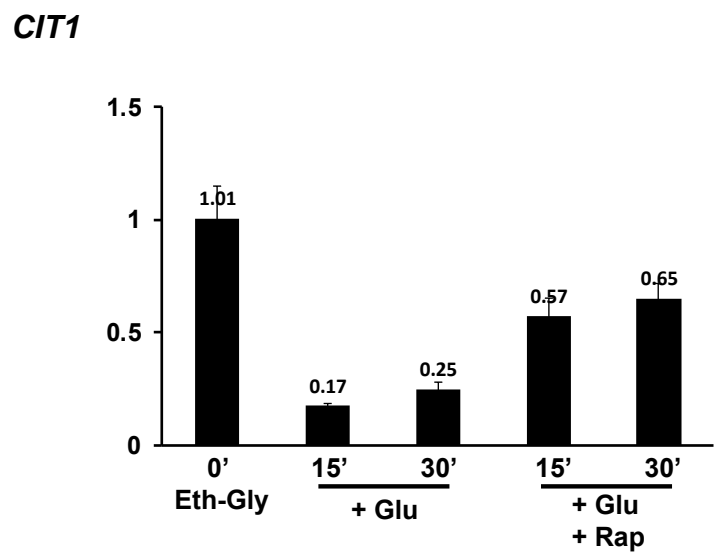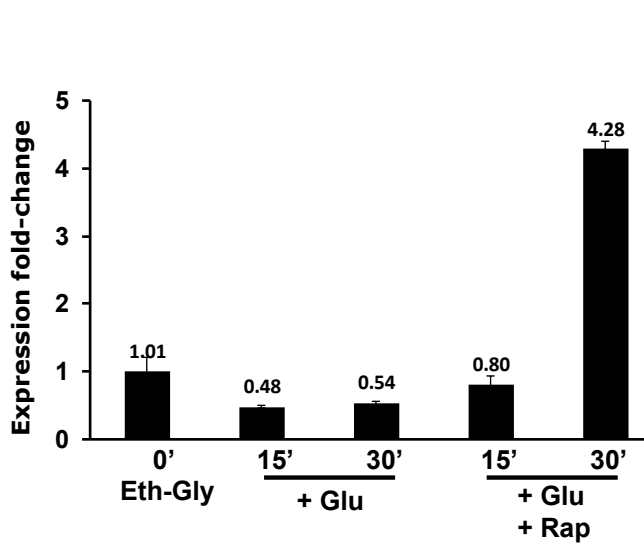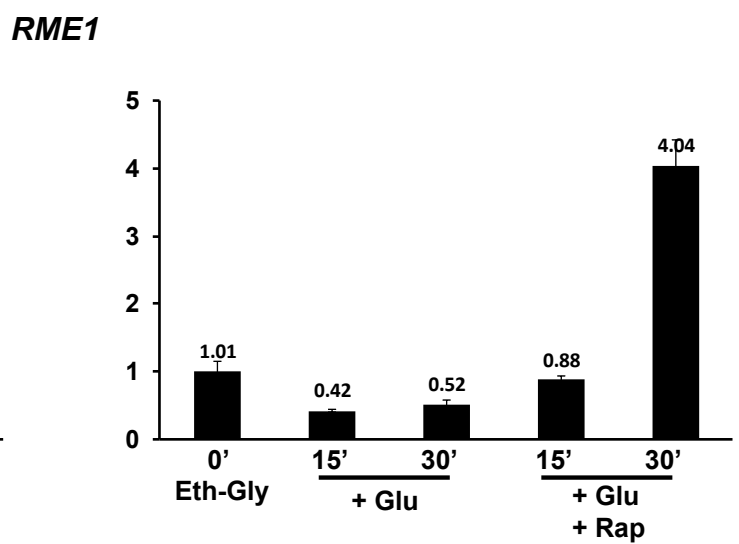

**Figure S5**

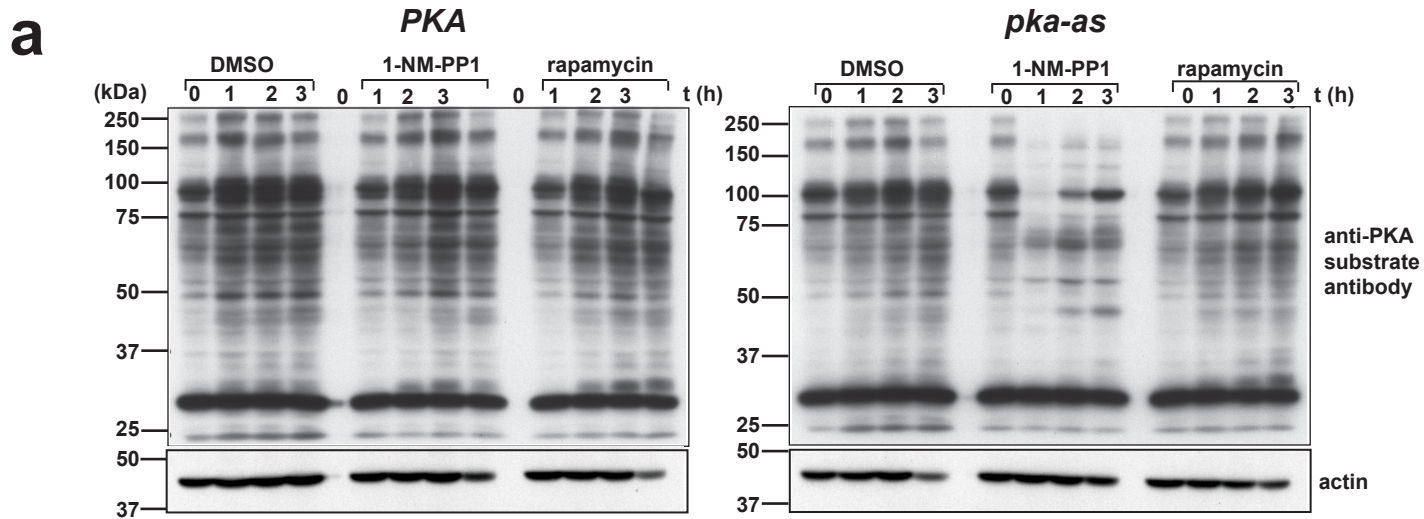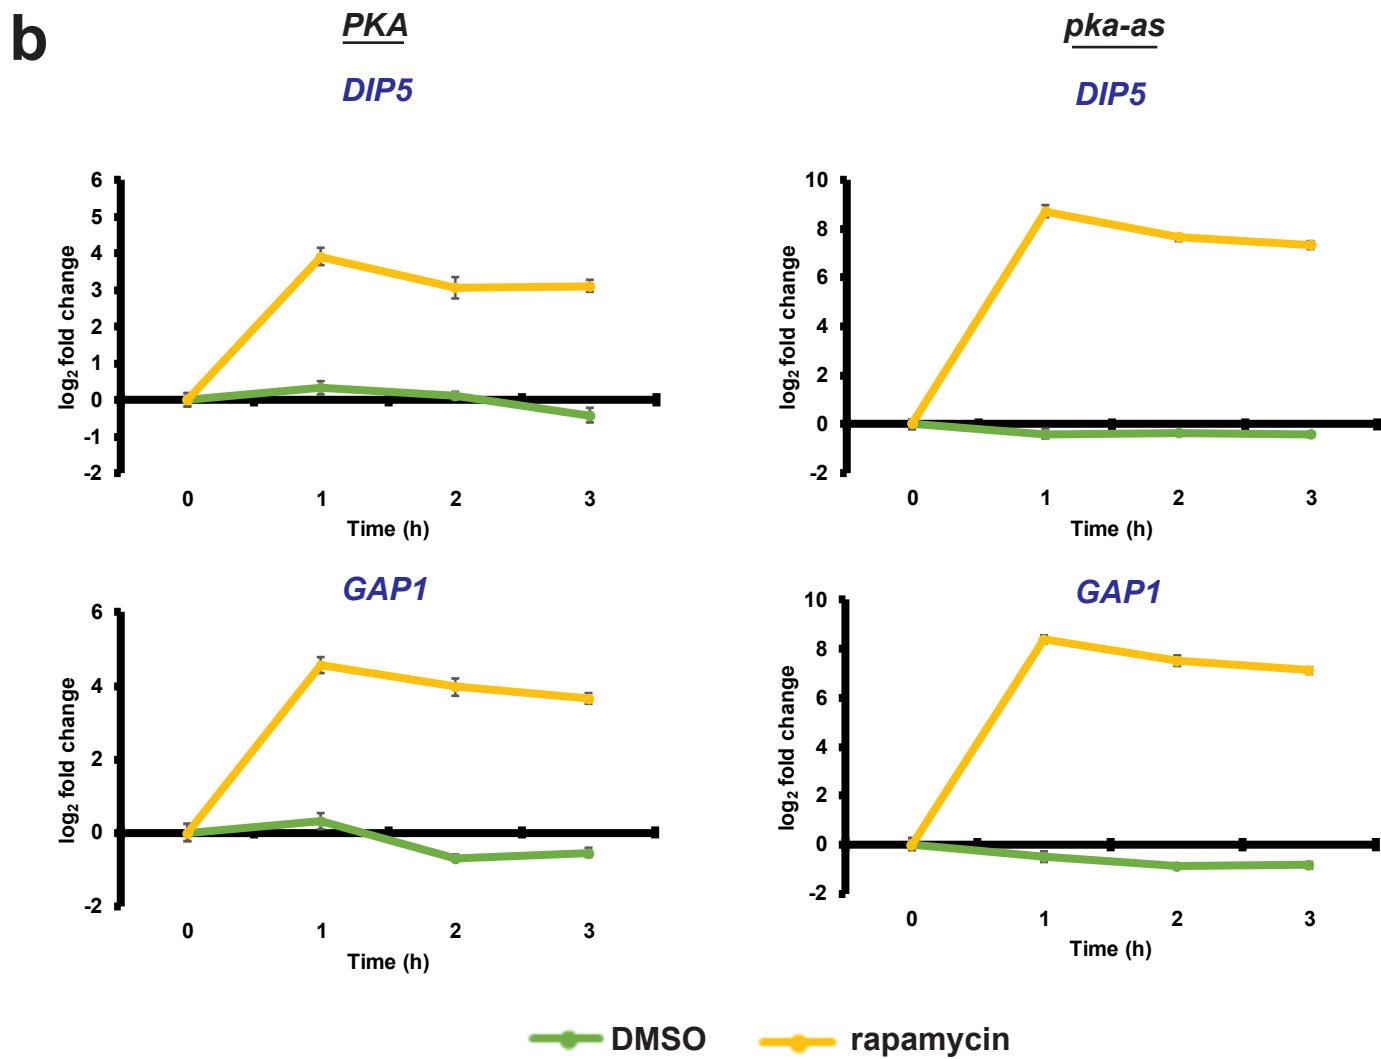

**Figure S6**

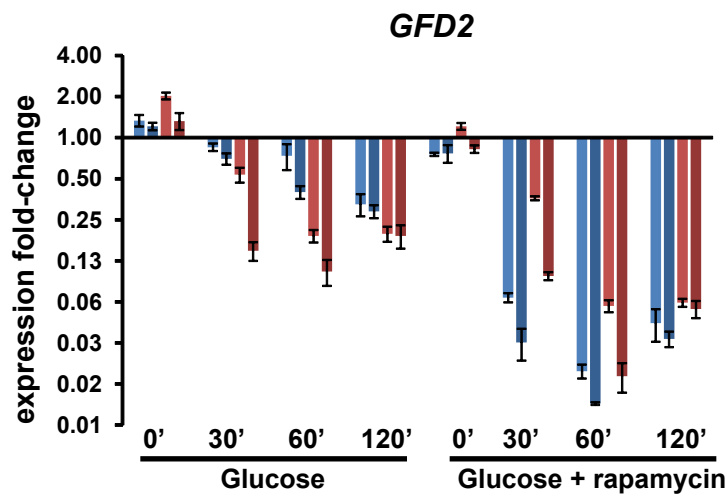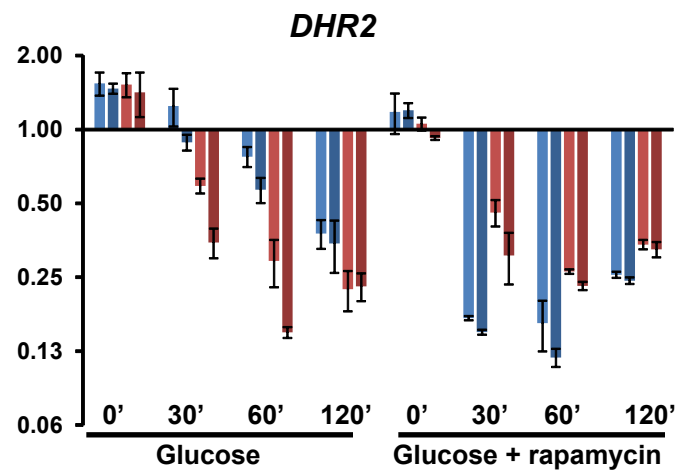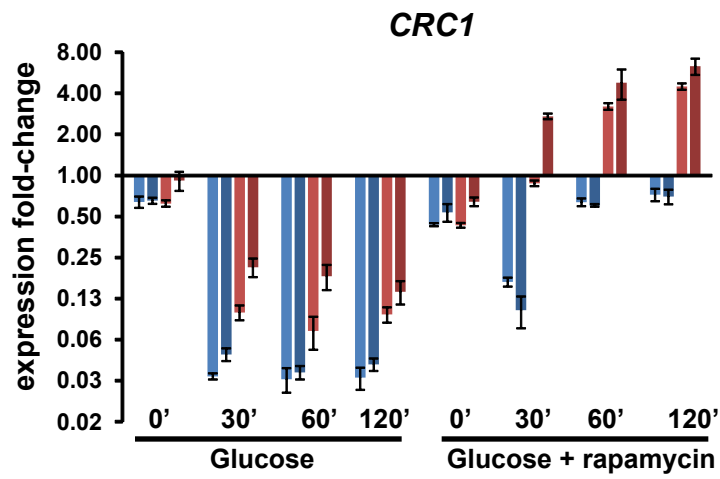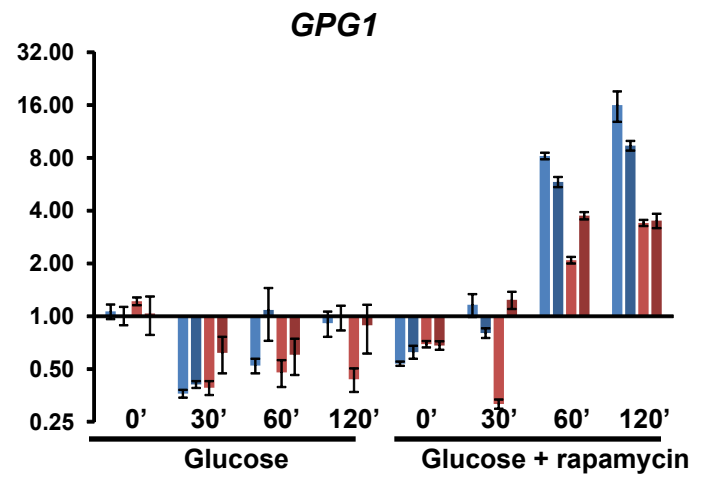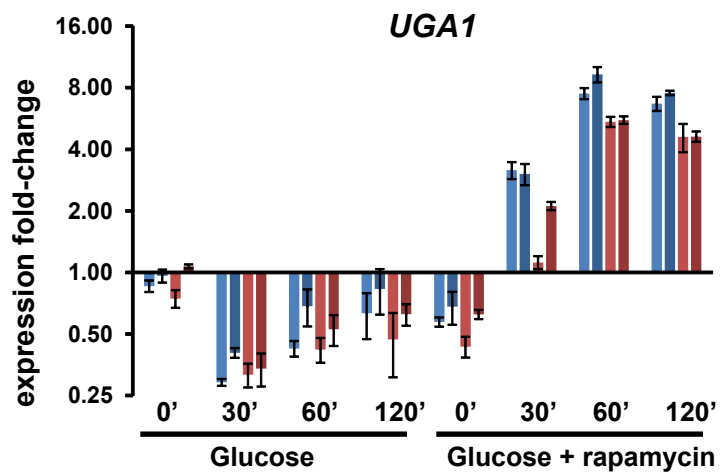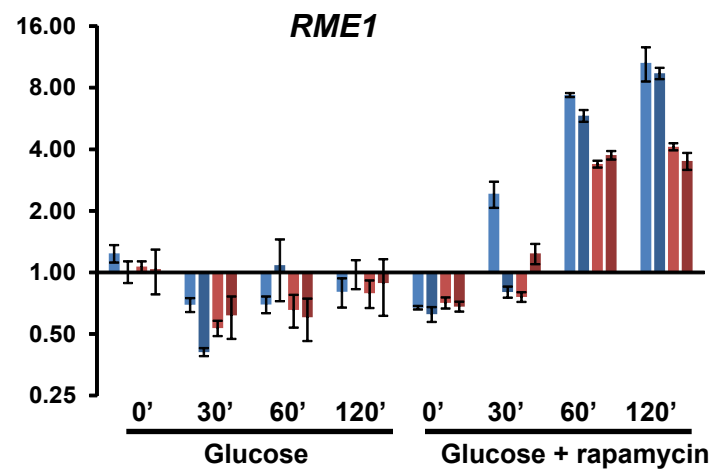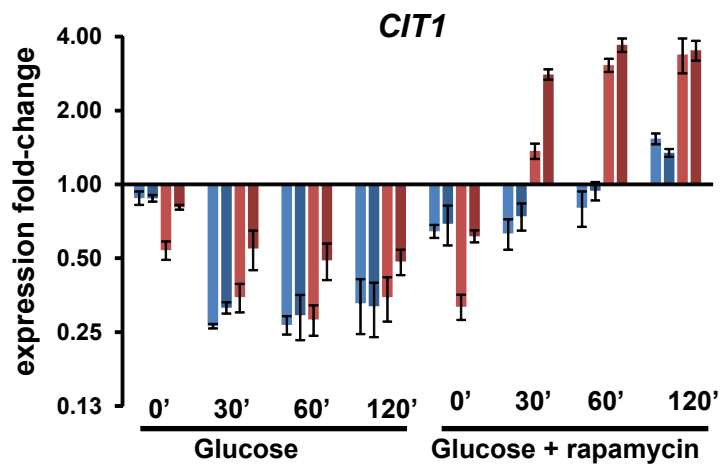

■ *SCH9* Replicate 2    ■ *sch9Δ* Replicate 2  
■ *SCH9* Replicate 3    ■ *sch9Δ* Replicate 3

**Figure S7**

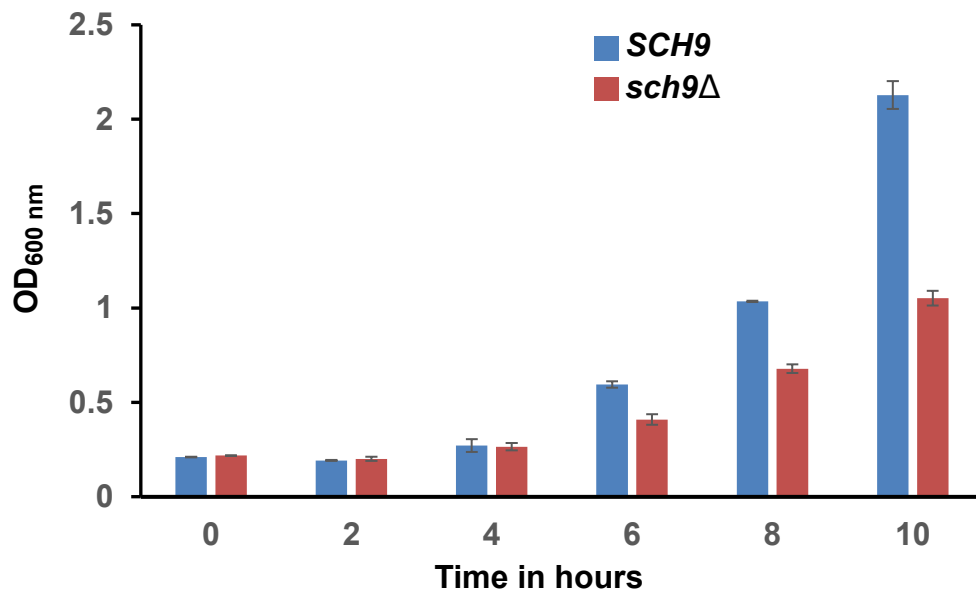

**Figure S8**

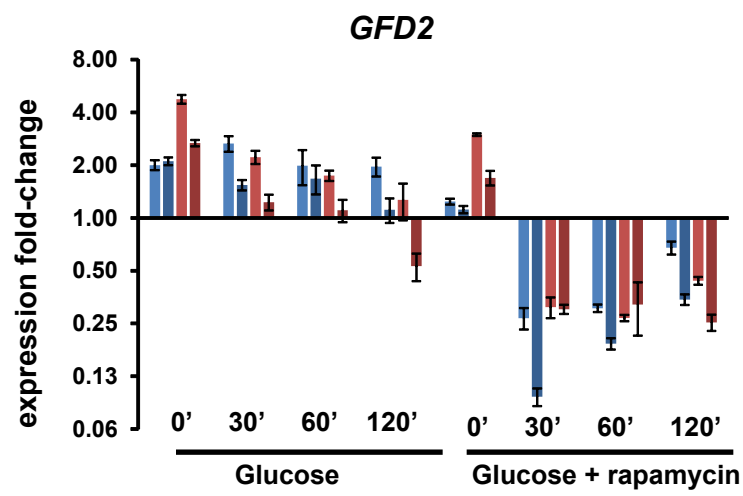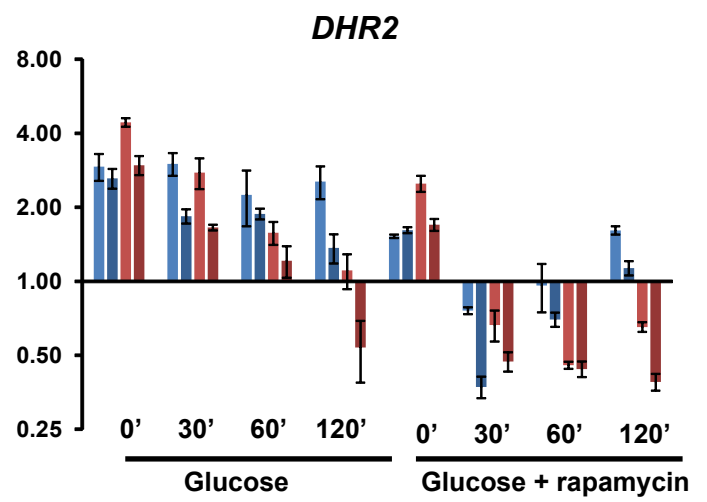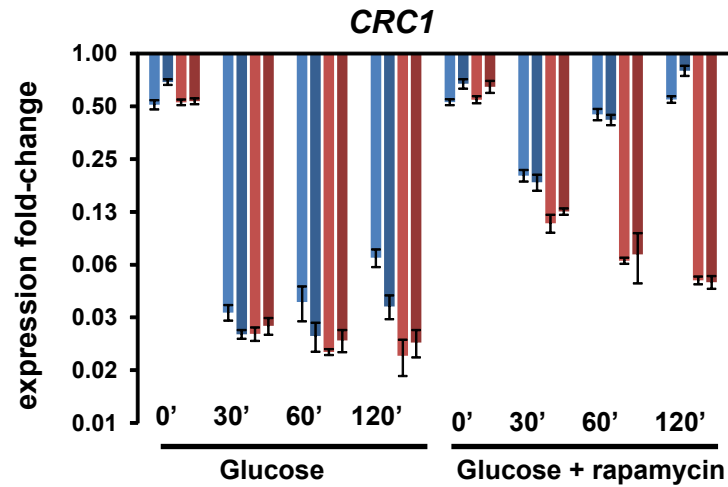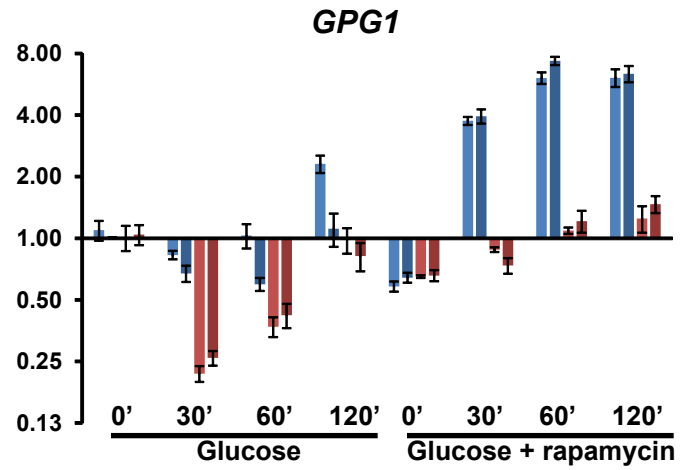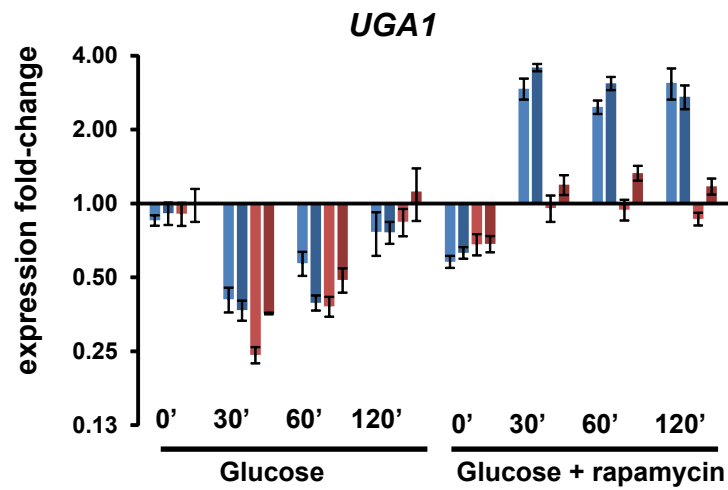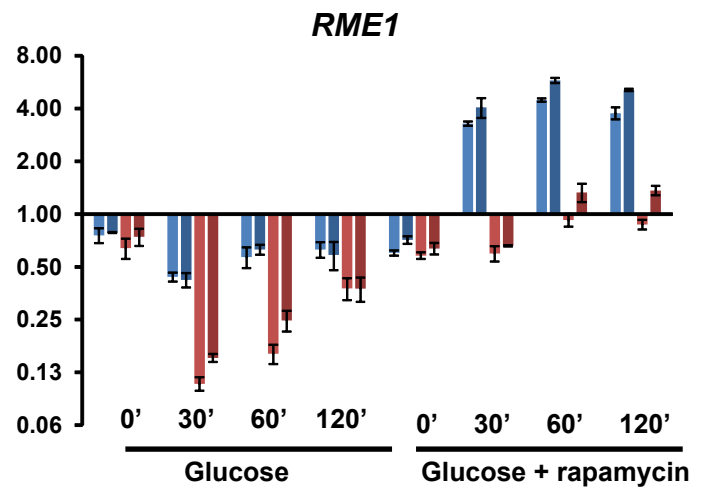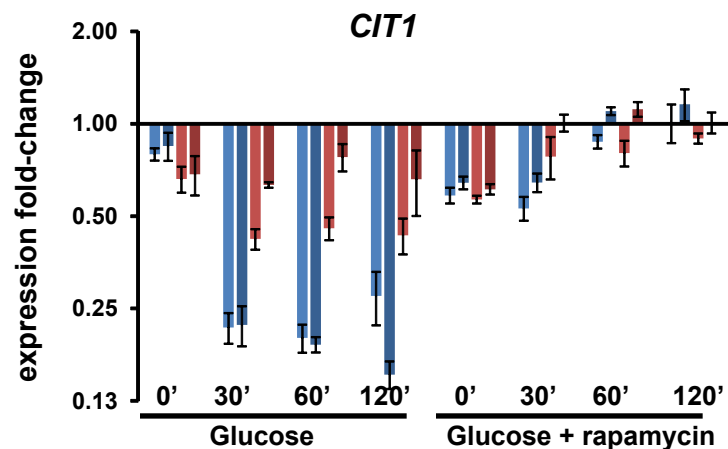

■ *TAP42* Replicate 2    ■ *tap42-11* Replicate 2  
■ *TAP42* Replicate 3    ■ *tap42-11* Replicate 3

**Figure S9**

**DHR2**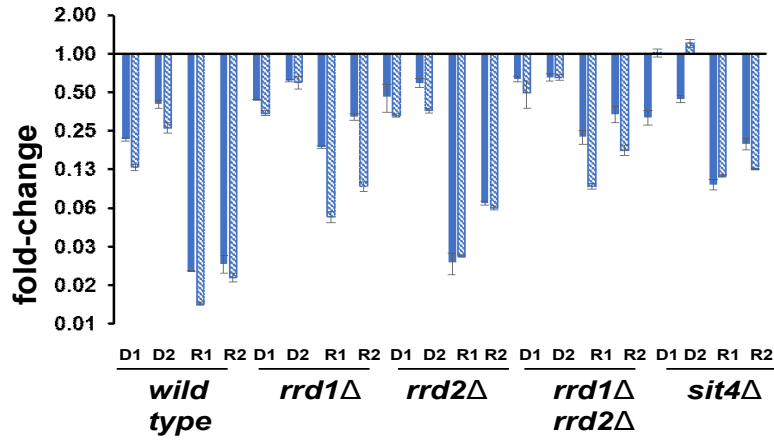**GFD2**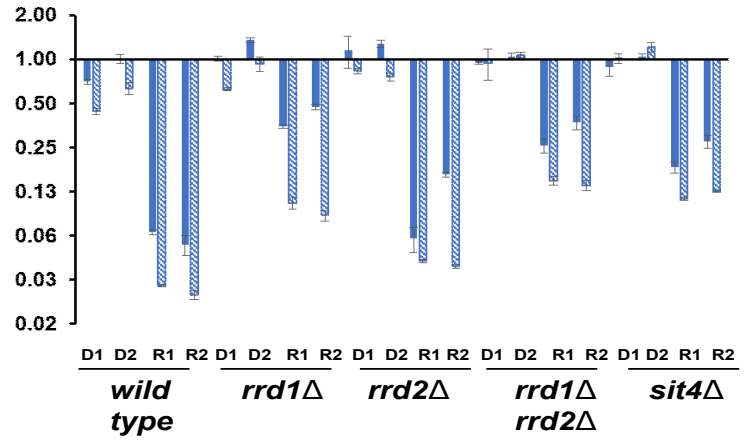**RME1**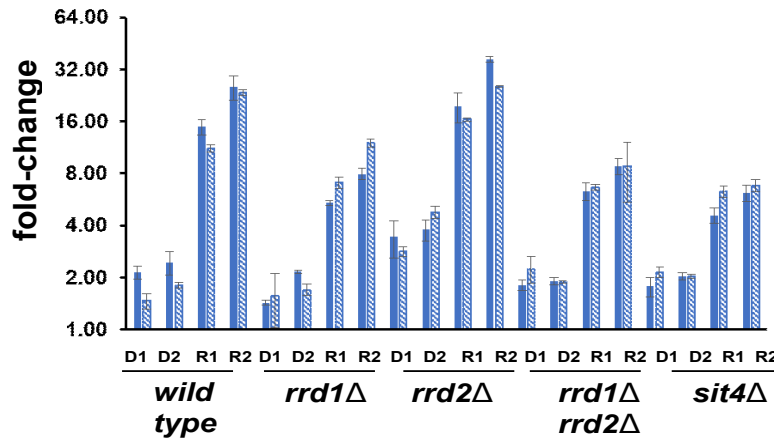**UGA1**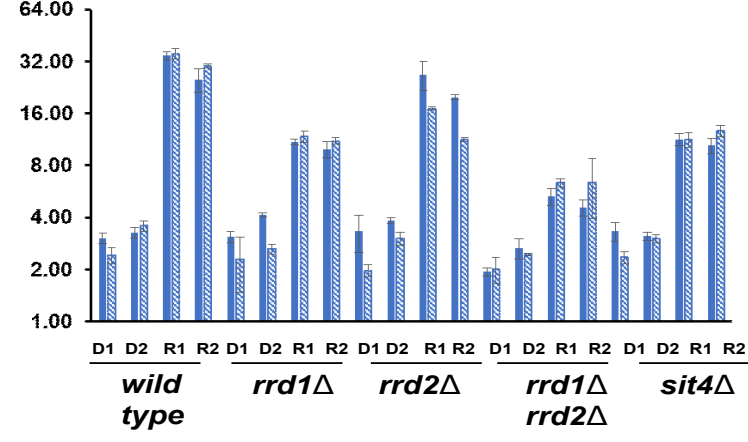**CRC1**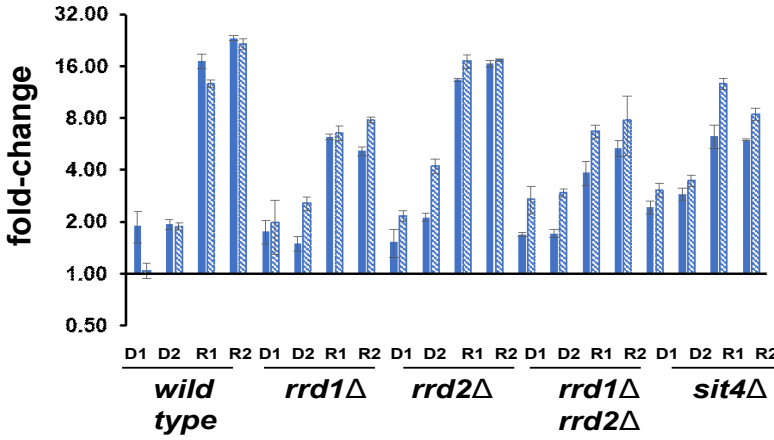**CIT1**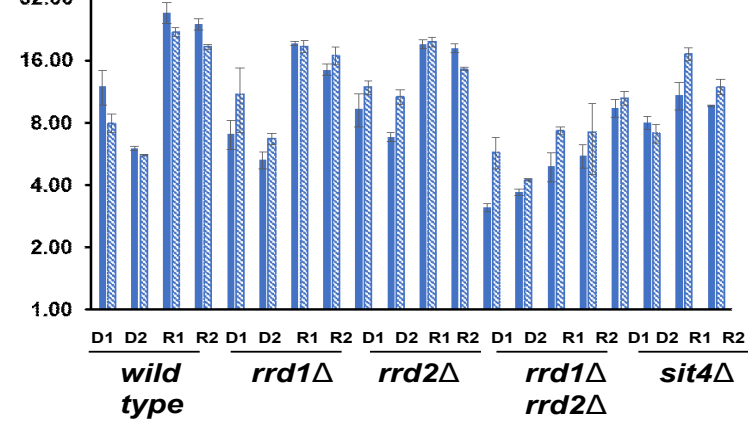**GPG1**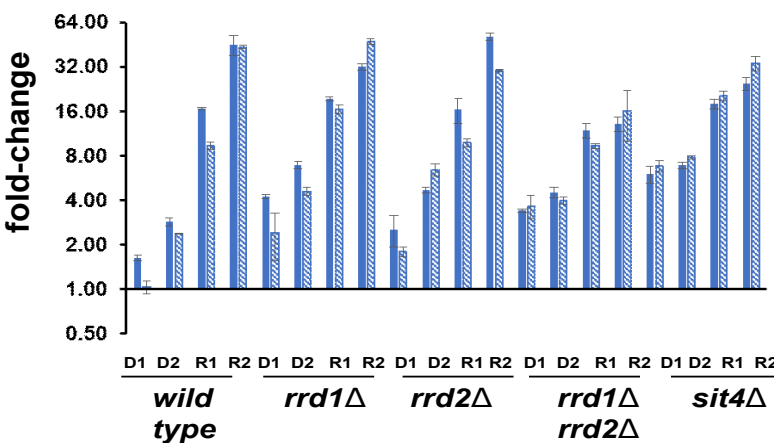

■ Replicate 2  
 ▨ Replicate 3

**Figure S10**

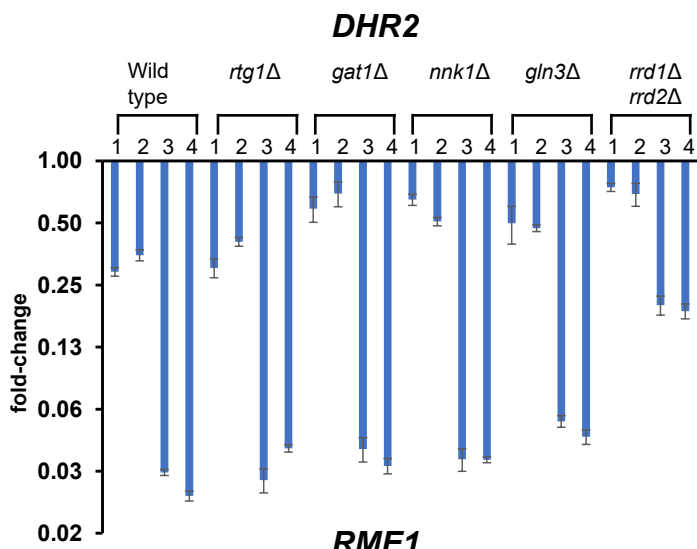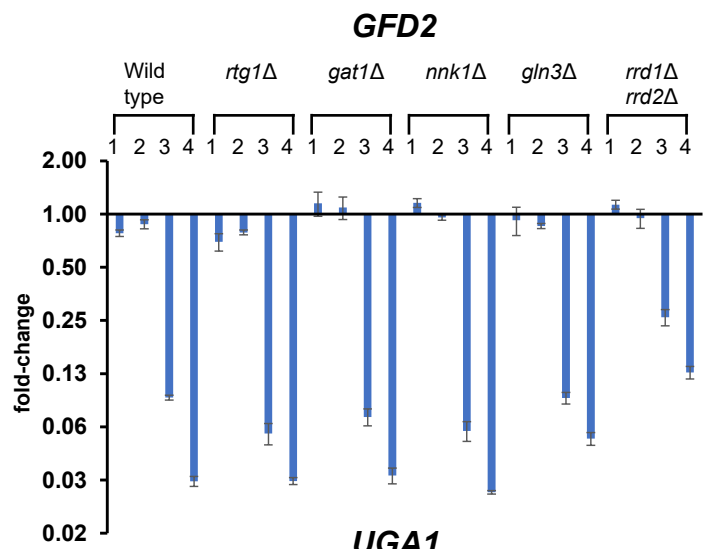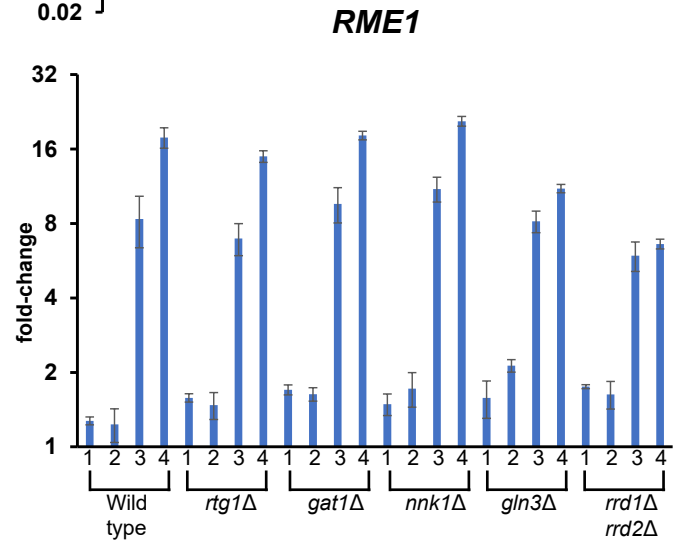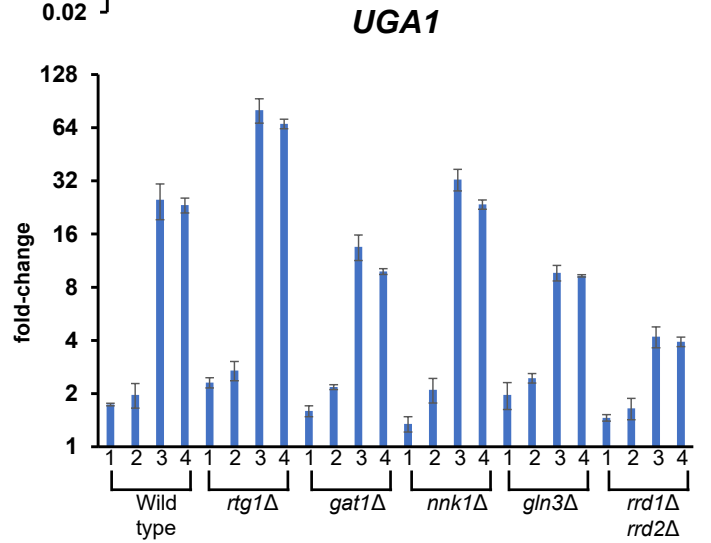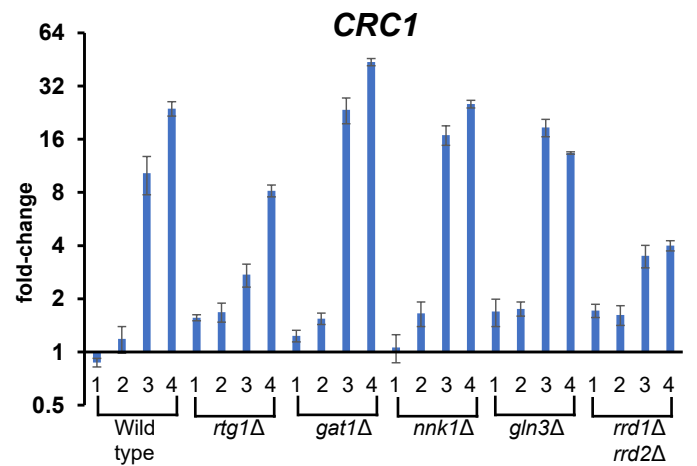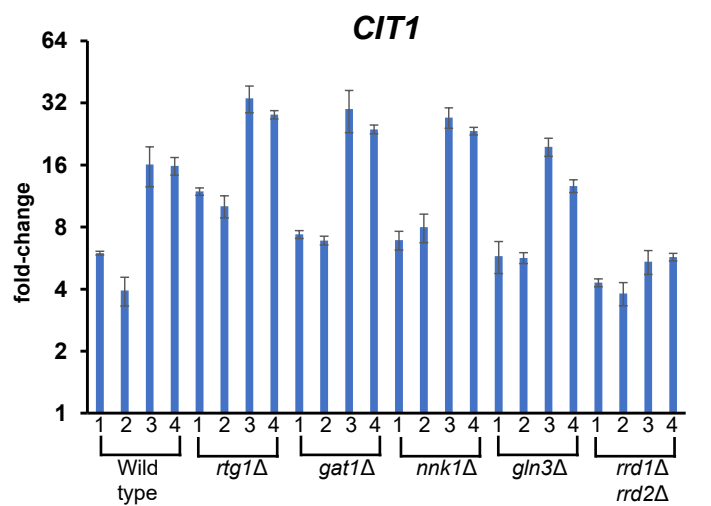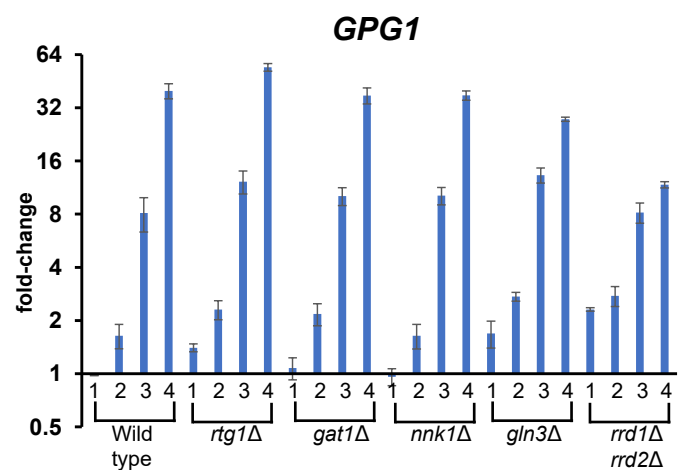

**Figure S11**



### Gln3

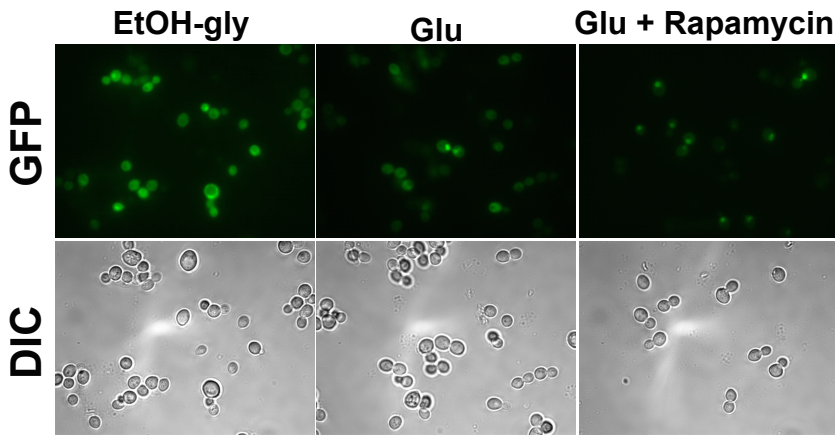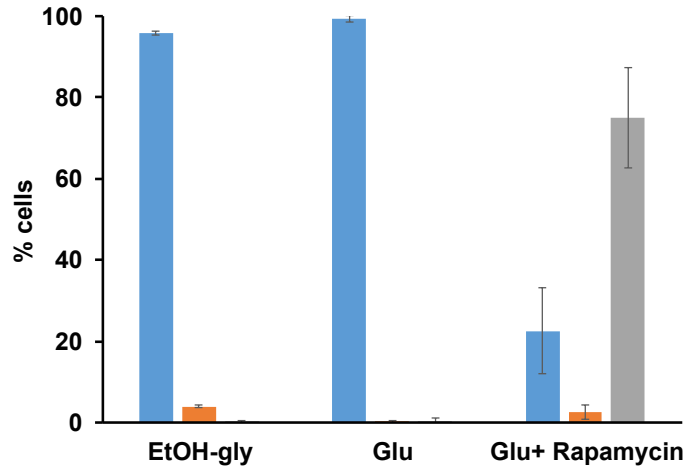

### Gat1

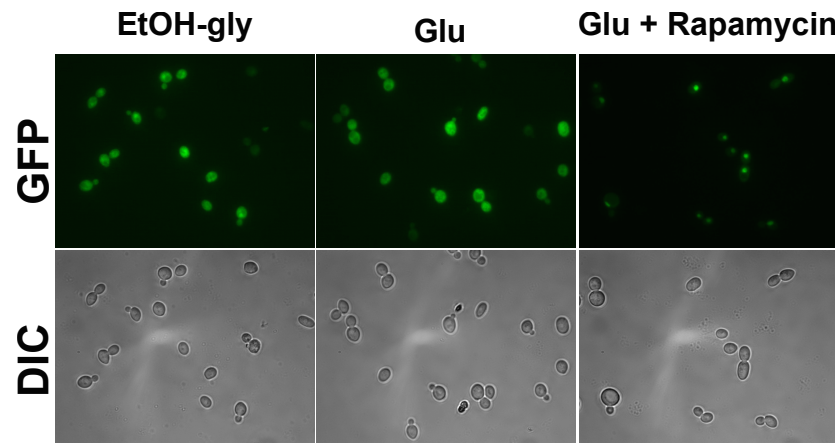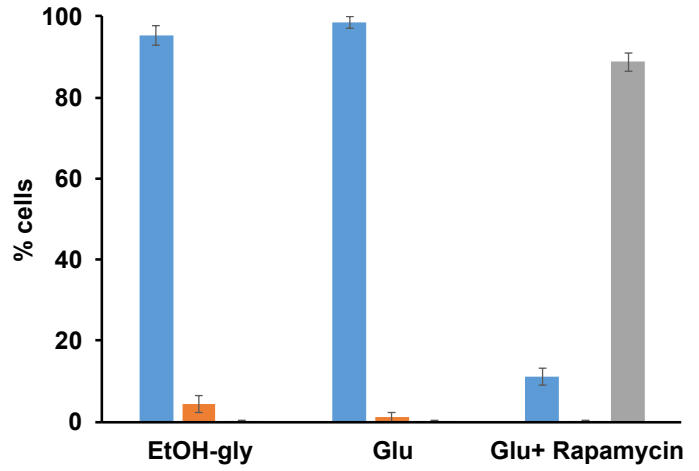

### Rtg1

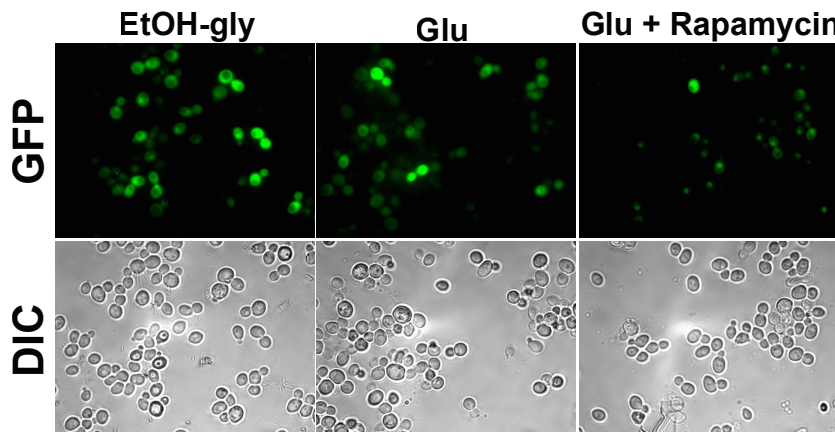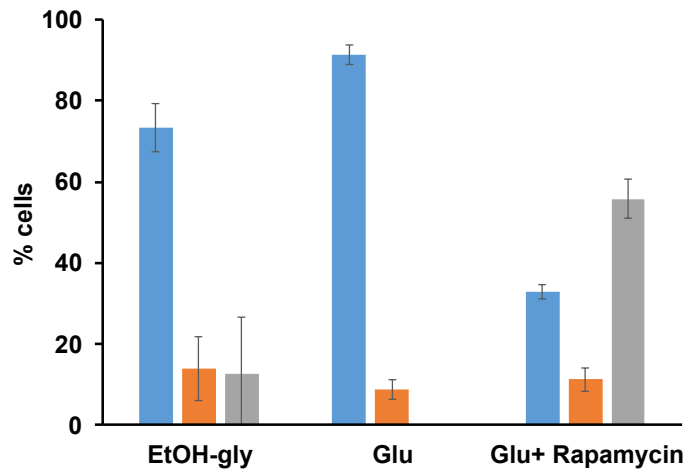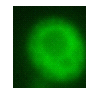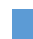

Cytoplasmic

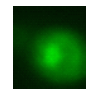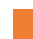

Nucleo cytoplasmic

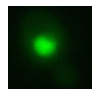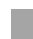

Nuclear

Figure S12
