# Supplementary material for: TORC1 regulates the transcriptional response to glucose and developmental cycle via the Tap42-Sit4-Rrd1/2 pathway in Saccharomyces cerevisiae
Source: PubMed Central journal article supplement (PMC8103650; doi:10.1186/s12915-021-01030-3), 2021-05-06
Supplement: 12915_2021_1030_MOESM5_ESM.pdf [file 12915_2021_1030_MOESM5_ESM.pdf]

■ (YPD+ DMSO-treated spores) vs (spore)

■ (YPD+ rapamycin-treated spores) vs (spore)

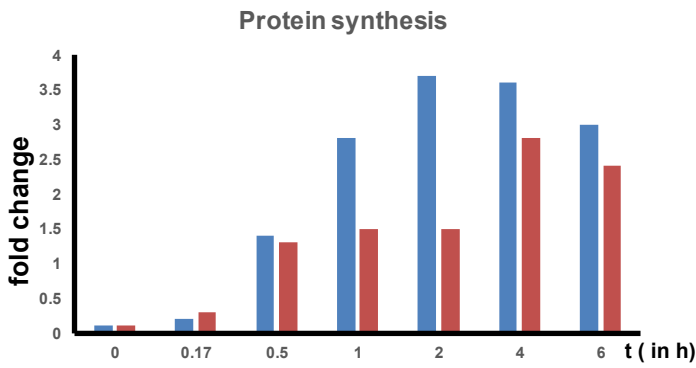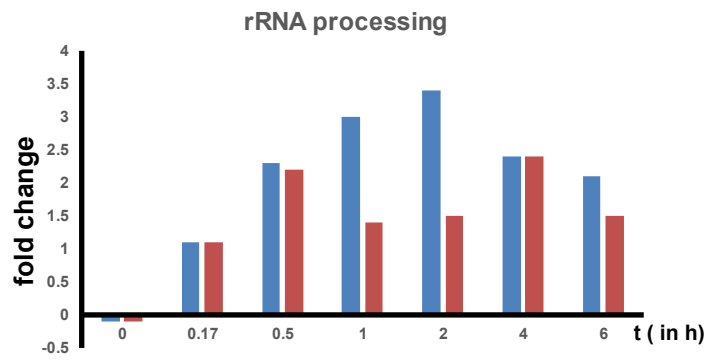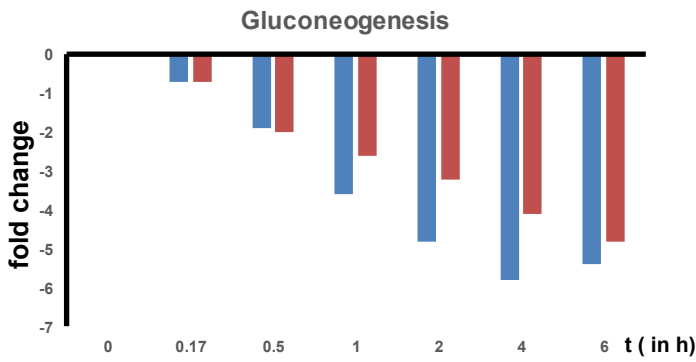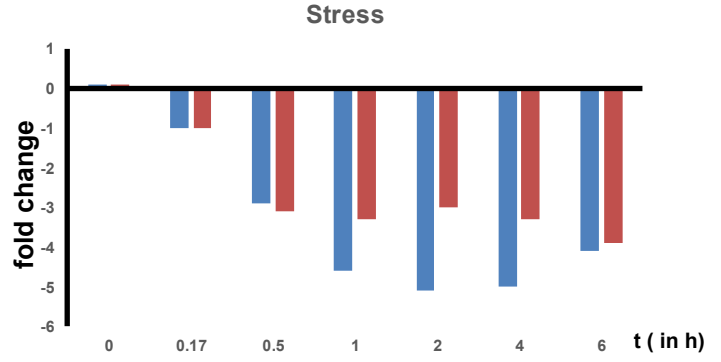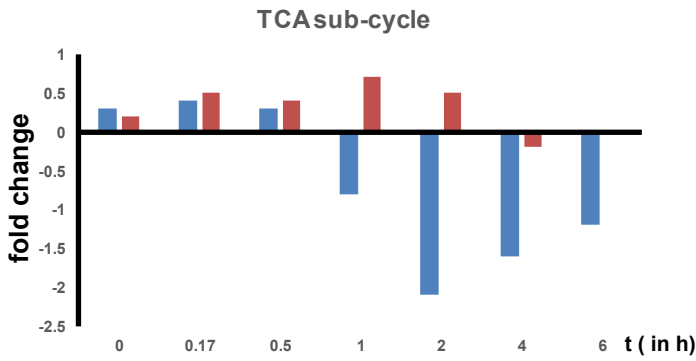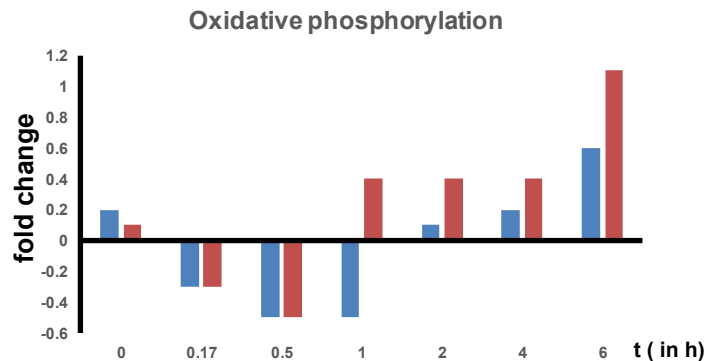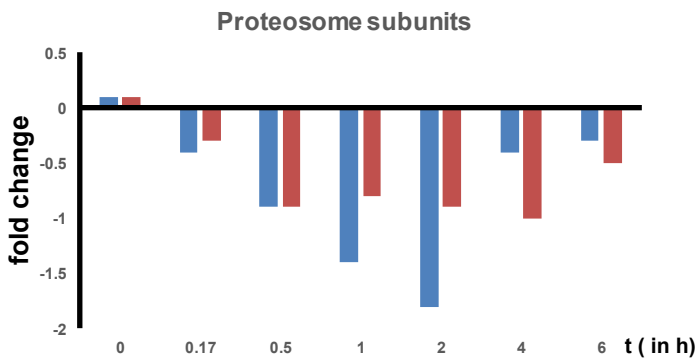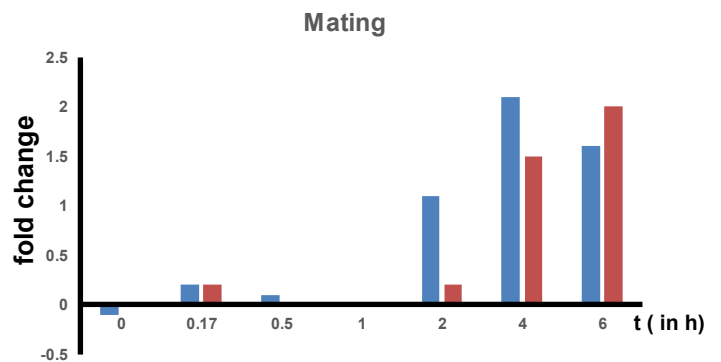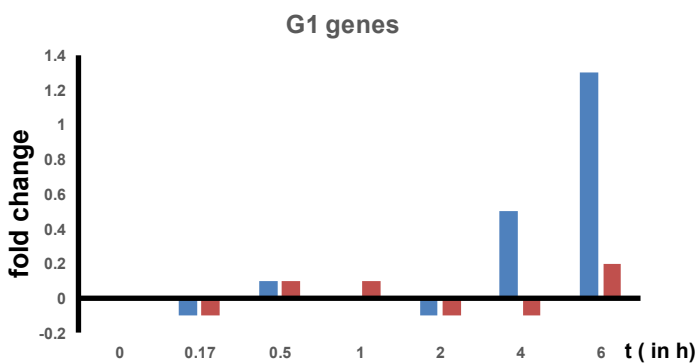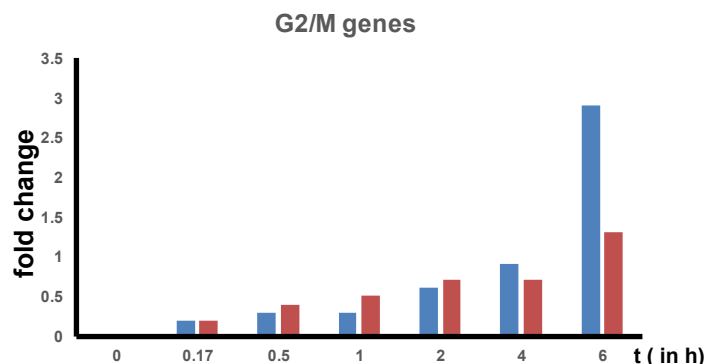

Figure S13
