# Supplementary material for: TORC1 regulates the transcriptional response to glucose and developmental cycle via the Tap42-Sit4-Rrd1/2 pathway in Saccharomyces cerevisiae
Source: PubMed Central journal article supplement (PMC8103650; doi:10.1186/s12915-021-01030-3), 2021-05-06
Supplement: 12915_2021_1030_MOESM9_ESM.pdf [file 12915_2021_1030_MOESM9_ESM.pdf]

**a****TORC1 targets**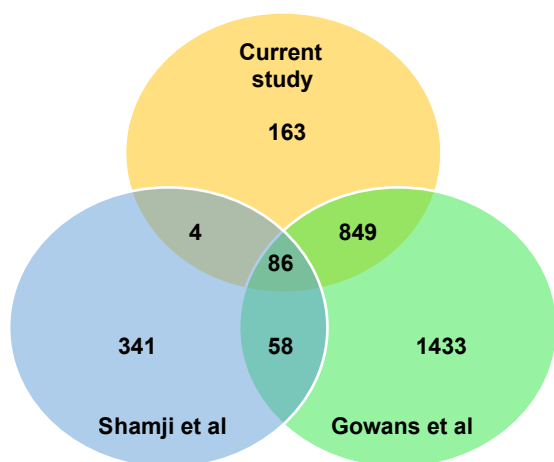**b****Glucose-response genes**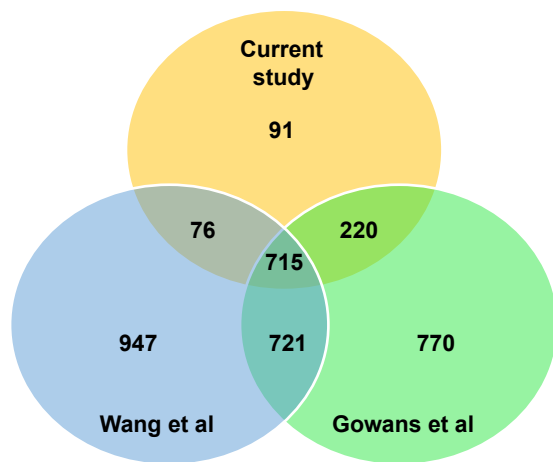**Figure S14**

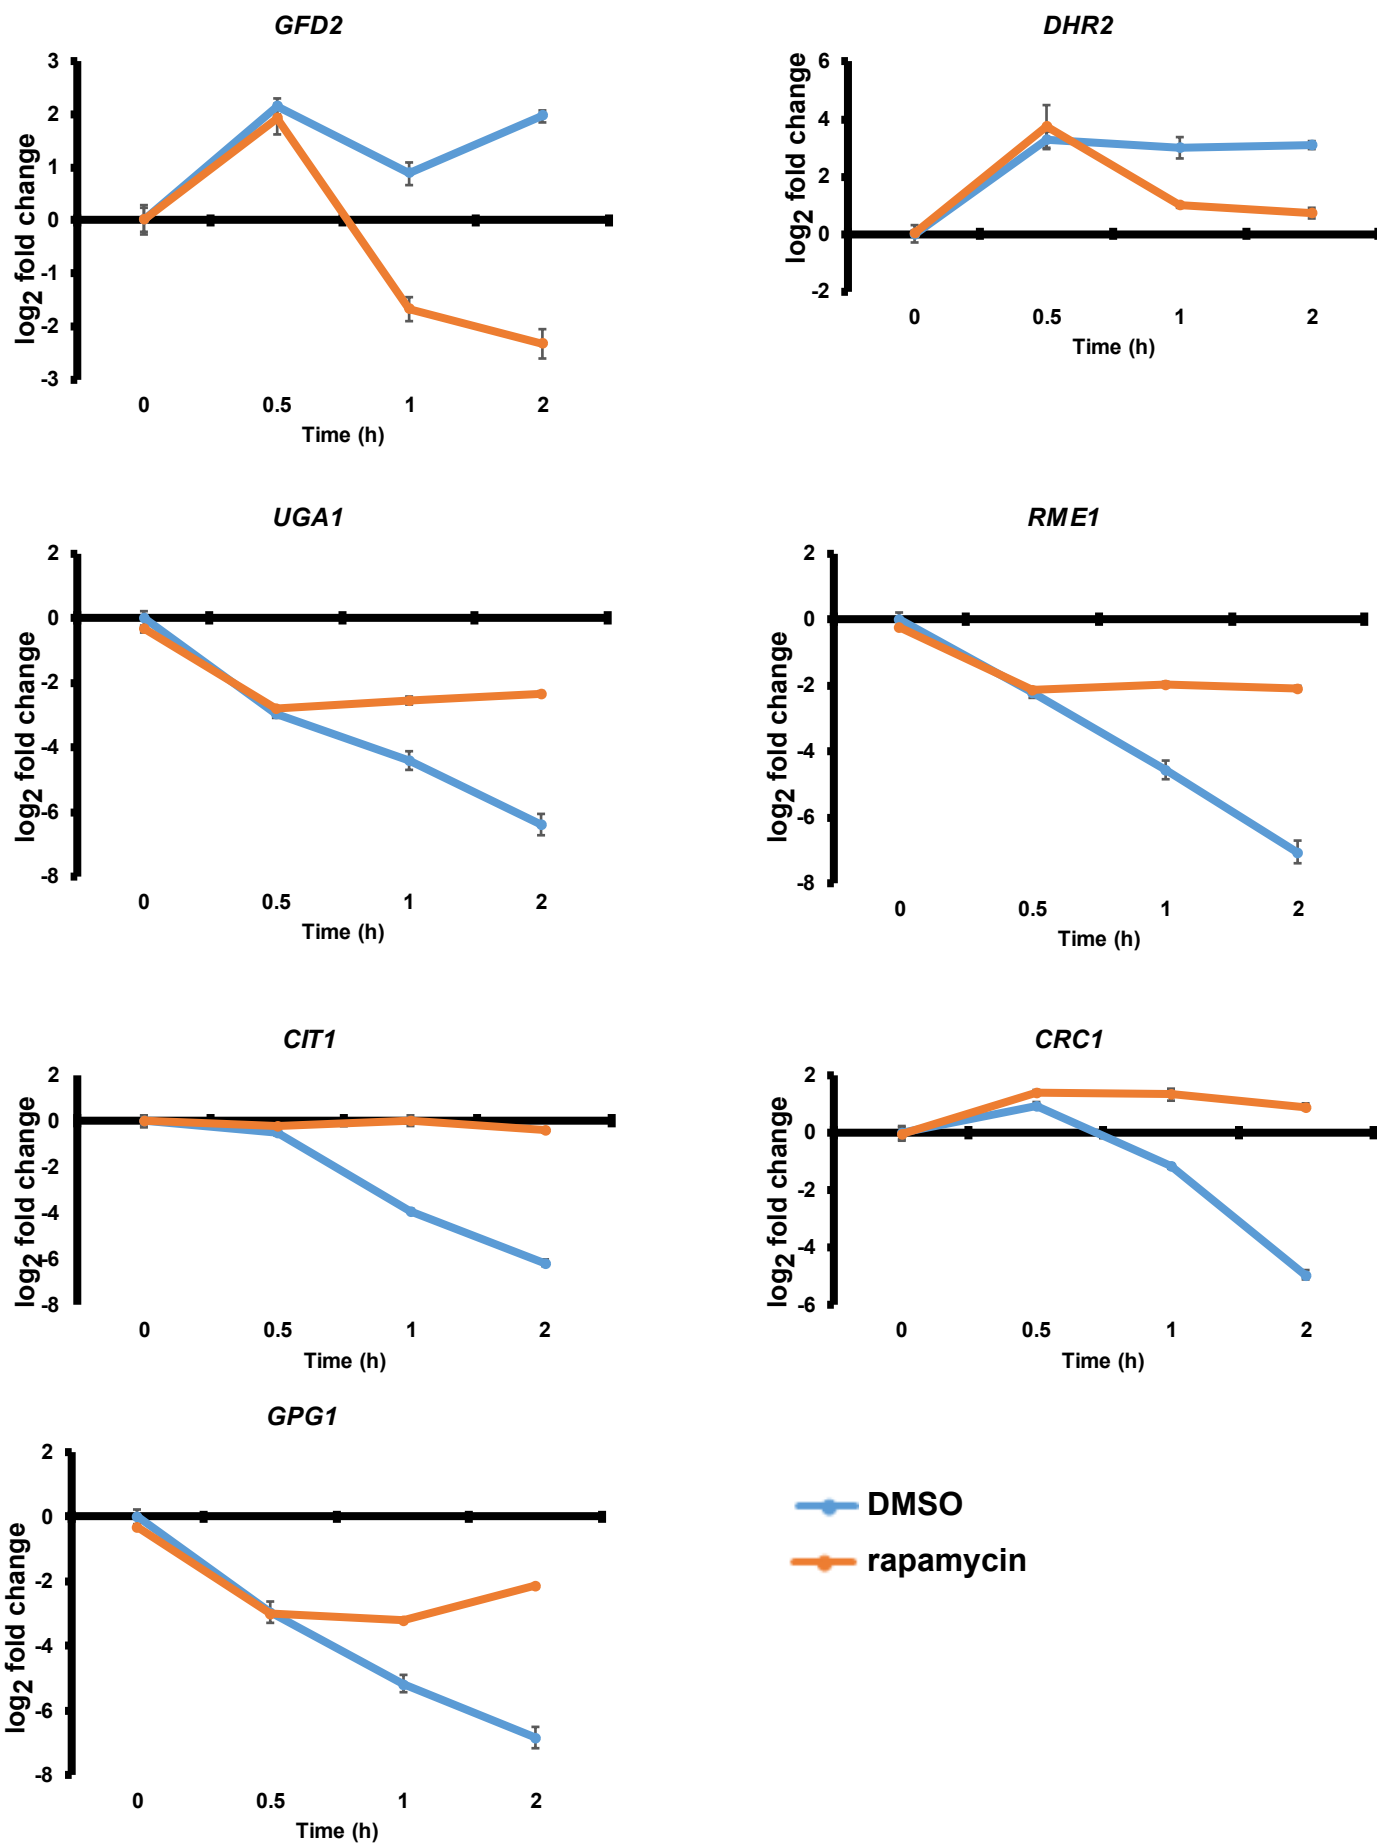

**Figure S15**

**a**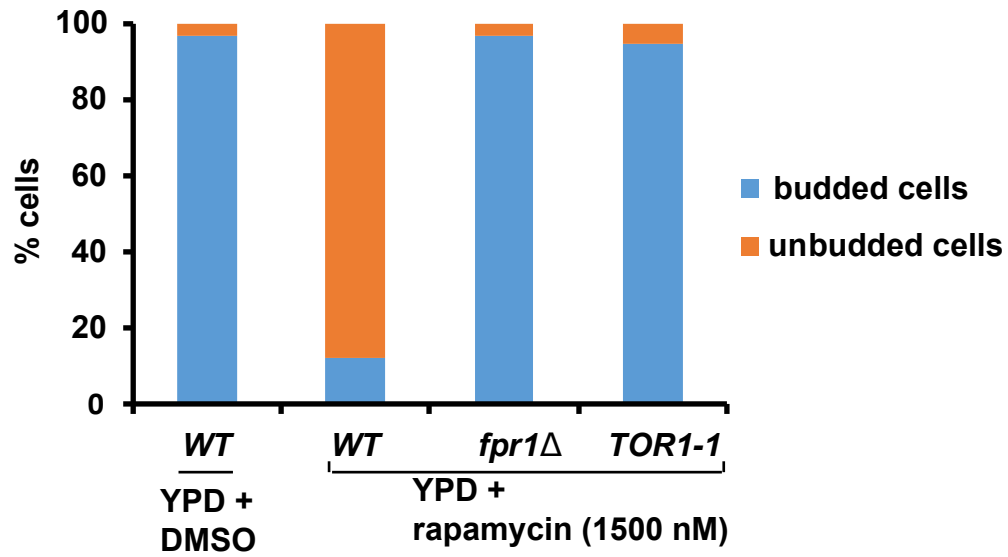**b**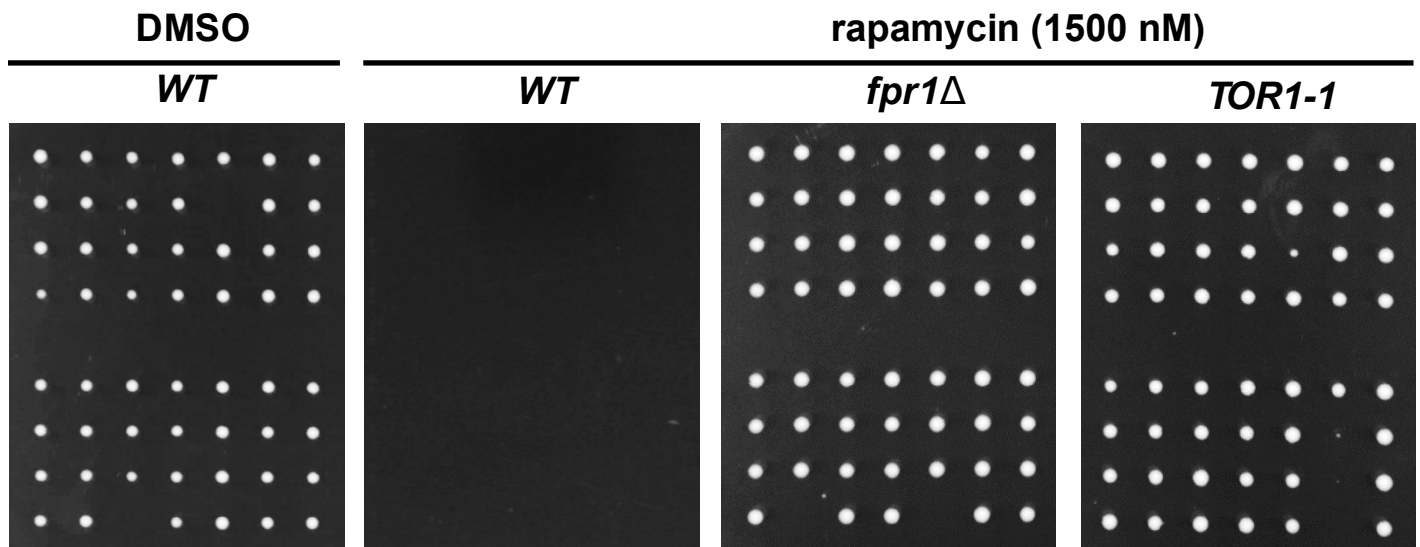**Figure S16**

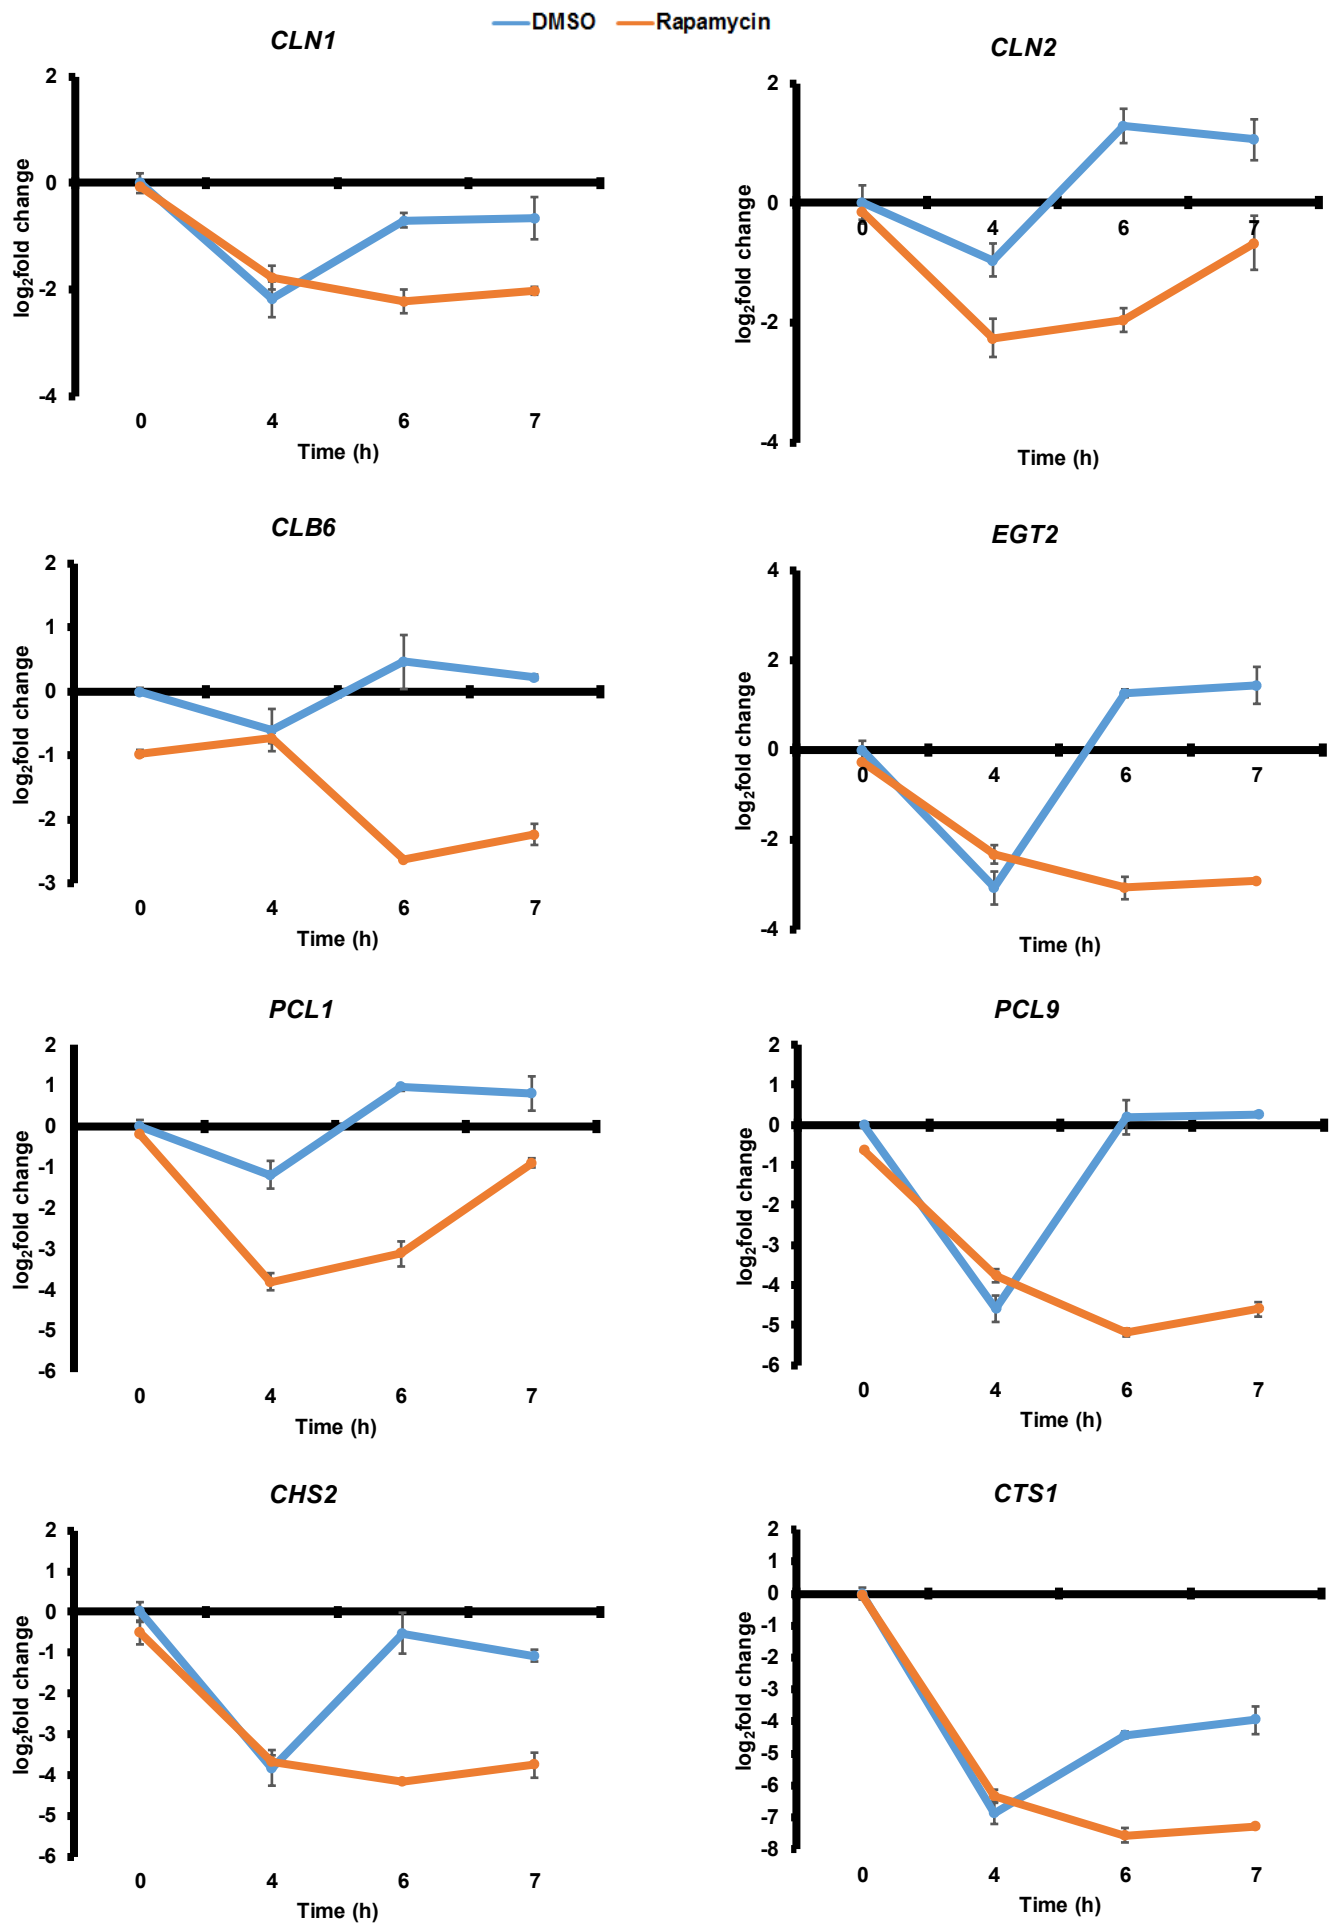

**Figure S17**

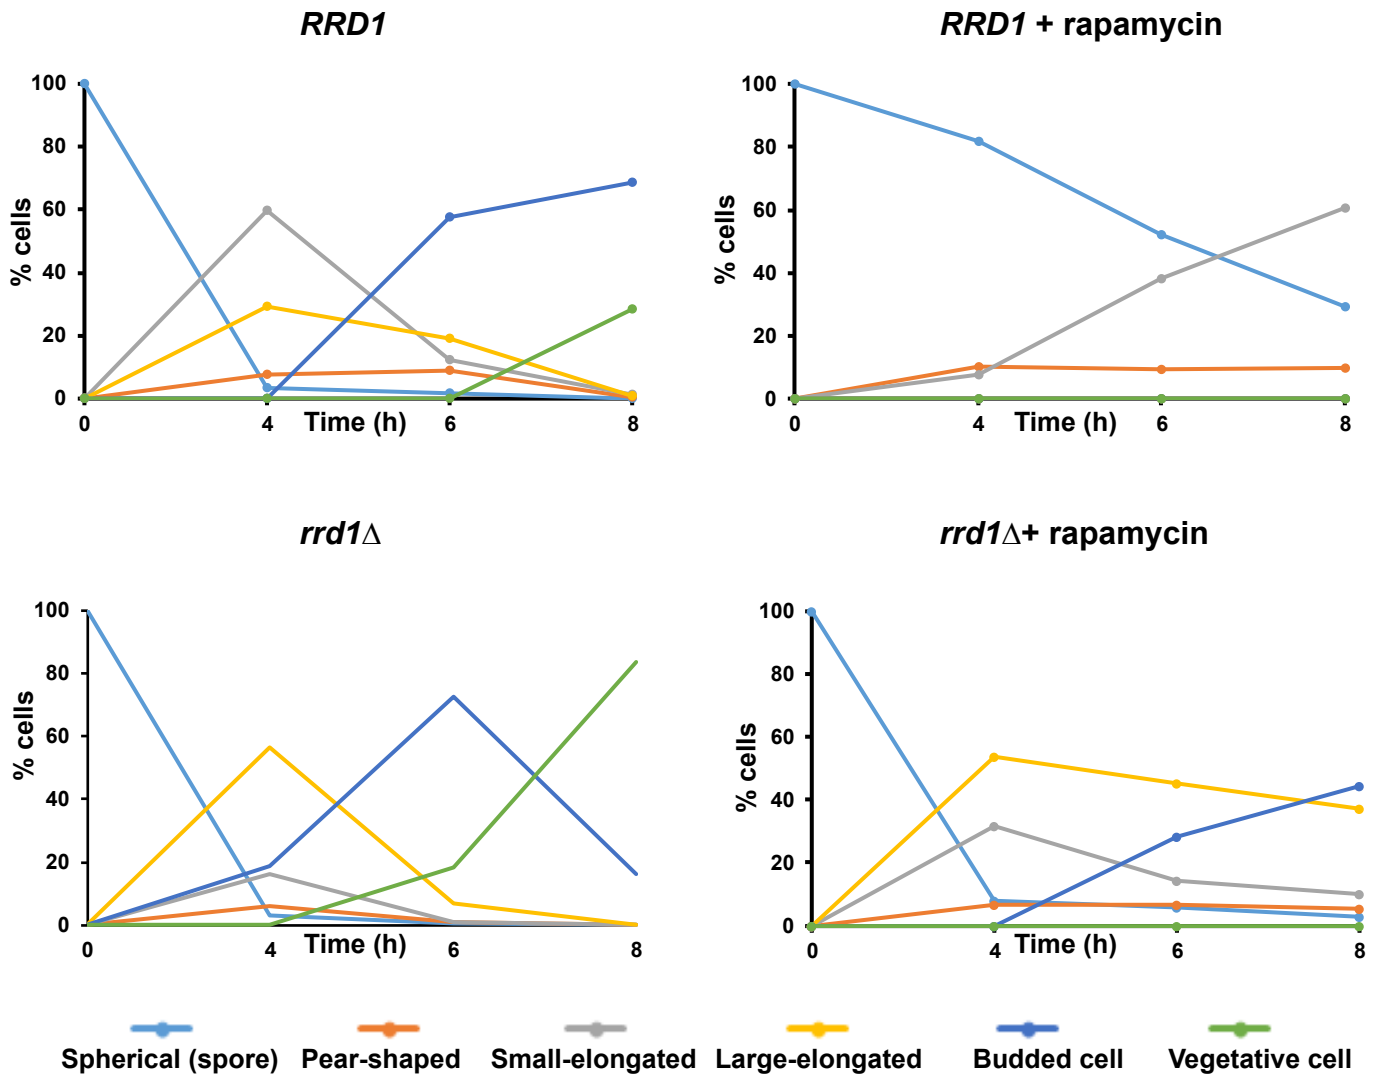

Figure S18
